# Supplementary material
Source: PubMed Central journal article supplement (PMC4933602)
Supplement: supp_4.2.E249_2015-0105-1-at.pdf [file supp_4.2.E249_2015-0105-1-at.pdf]

**Appendix 1 (as supplied by the authors): Map of Eeyou Istchee's (Terres-Cries-de-la-Baie-James) health network and road access**

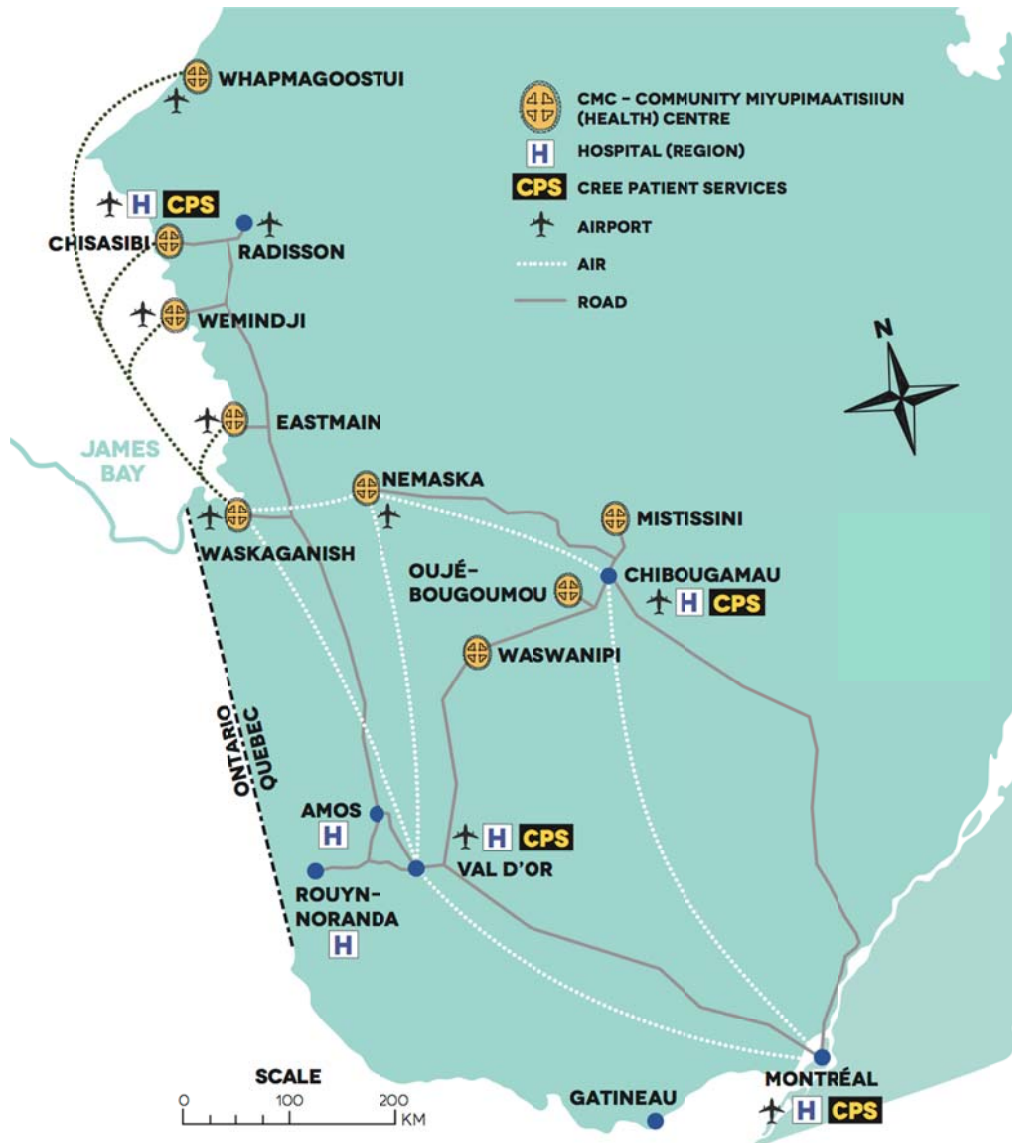

Each of the 9 communities in Eeyou Istchee has a local medical clinic (CMC) except for 1 community where there is a local hospital. Four communities are considered inland and four other communities bordering the James Bay are considered coastal. These last communities all have access to the provincial road network. A single northernmost community bordered by the Hudson Bay is considered remote, where there is no access to the provincial road network. For the secondary analysis chart review, all local clinic charts were audited for identified cases as well as the charts at the secondary and tertiary trauma hospitals that are part of the Terres-Cries-de-la-Baie-James health network. Reproduced with permission from the CBHSSJB (Cree Board of Health and Social Services of James Bay), 2014 (<http://www.creehealth.org/communities>); accessed 2015 Apr. 22.
