# Supplementary material
Source: PubMed Central journal article supplement (PMC4933602)
Supplement: supp_4.2.E249_2015-0105-2-at.pdf [file supp_4.2.E249_2015-0105-2-at.pdf]

**Appendix 2 (as supplied by the authors):** International Classification of Disease (ICD) codes used to define traumatic brain injury incident cases and external causes of injury using the ICD-9 and ICD-10 CA iterations

|                                         | International Classification of Disease Iteration codes                                                  |                                                                                          |
|-----------------------------------------|----------------------------------------------------------------------------------------------------------|------------------------------------------------------------------------------------------|
| Traumatic brain injury diagnostic codes | ICD-9                                                                                                    | ICD-10 CA                                                                                |
| <i>Skull fractures</i>                  | 800.0-801.9<br>803.0-804.9                                                                               | S02.0-S02.1<br>S02.7<br>S02.89<br>S02.9                                                  |
| <i>Intracranial lesions</i>             | 850.0-854.1                                                                                              | S06.0-S06.9<br>T06.0                                                                     |
| External causes of Injury               | ICD-9                                                                                                    | ICD-10 CA                                                                                |
| <i>Motor vehicle traffic accident</i>   | E810-E819 (.0, .1)                                                                                       | V30-V79 (.4-.9) V83-V85 (.0-.3)                                                          |
| <i>Motorcycle accident</i>              | E810-E819 (.2, .3)                                                                                       | V20-V29 (.3-.9)                                                                          |
| <i>Snowmobile accident</i>              | E820 (.0, .2, .3, .8, .9)                                                                                | V86 (0.02)                                                                               |
| <i>All-terrain vehicle accident</i>     | E821 (.0, .2, .3, .8, .9)                                                                                | V86 (0.03, 0.09)                                                                         |
| <i>Fall</i>                             | E880-E882, E883 (.1-.9), E884 (.1-.9), E885, E886.9, E887-E888                                           | W00-W01, W03-W08, W10-W15, W17-W19, X59.0                                                |
| <i>Recreational/sports accident</i>     | E828.2, E830-E831 (.4, .5), E842.6, E883-E884 (.0), E886 (.0), E902.2, E910 (.0, .1, .2), E917.0, E927.9 | V80, V90-V94 (.5,.7,.8), V96, W02, W09, W16, W21, W22 (.0-.7), W51 (.0-.7), W67-W70, X50 |
| <i>Bicycle accident</i>                 | E800-E809 (.3), E810-E819 (.6), E820-E825 (.6), E826-E829 (.1), E826.9                                   | V10-V19                                                                                  |
| <i>Pedestrian</i>                       | E800-E809 (.2), E810-E819 (.7), E820-E825 (.7), E826-E829 (.0)                                           | V01-V09                                                                                  |
| <i>Assault</i>                          | E960-E969                                                                                                | X92-X99, Y00-Y09                                                                         |

Legend: Similarly to the Institut National de Santé Publique du Québec surveillance study, ICD 9 codes were used for case definitions between 2000 and 2005 and ICD-10 CA codes were used for case definitions between 2006 and 2012.[1] The present study additionally included cases that resulted from assaults, which the Institut National de Santé Publique du Québec did not include.

## Reference

- Gagné M, Robitaille Y, Légaré G, et al. *Évolution des hospitalisations attribuables aux traumatismes craniocérébraux d'origine non intentionnelle au Québec*. Québec: Institut national de santé publique du Québec; 2012. Available: [www.inspq.qc.ca/pdf/publications/1473\\_EvolHospitaAttribuTCCNonIntentQc.pdf](http://www.inspq.qc.ca/pdf/publications/1473_EvolHospitaAttribuTCCNonIntentQc.pdf) (accessed 2015 May 13).
