# Supplementary material
Source: PubMed Central journal article supplement (PMC4933602)
Supplement: supp_4.2.E249_2015-0105-3-at.pdf [file supp_4.2.E249_2015-0105-3-at.pdf]

**Appendix 3 (as supplied by the authors):** Associations between mechanism of injury leading to traumatic brain injury hospitalization and health regions using multinomial regression for the complete-case analysis.

| <b>Region and mechanism of injury</b> | <b>Relative probability ratio</b> | <b>95% confidence interval</b> |
|---------------------------------------|-----------------------------------|--------------------------------|
| <b>Nord-du-Québec</b>                 |                                   |                                |
| Assault                               | 1.47                              | 0.69 , 3.11                    |
| All-terrain vehicle                   | 4.11                              | 2.28 , 7.38                    |
| Snowmobile                            | 4.66                              | 1.12 , 19.37                   |
| <b>Nunavik</b>                        |                                   |                                |
| Assault                               | 11.77                             | 8.40 , 16.48                   |
| All-terrain vehicle                   | 38.06                             | 28.40 , 51.00                  |
| Snowmobile                            | 32.77                             | 18.59 , 57.78                  |
| <b>Terres-Cries-de-la-Baie-James</b>  |                                   |                                |
| Assault                               | 10.69                             | 6.81 , 16.80                   |
| All-terrain vehicle                   | 6.06                              | 3.38 , 10.87                   |
| Snowmobile                            | 34.20                             | 16.97 , 68.94                  |

The referent population is the entire province of Québec and the referent mechanism of injury is falls. The model was adjusted for age and sex. The rest of the output is available below.

| Coefficient           | Relative probability ratio | 95% confidence interval |
|-----------------------|----------------------------|-------------------------|
| Intercept: Assault    | 0.08                       | 0.07 - 0.09             |
| Intercept :ATV        | 0.07                       | 0.06-0.08               |
| Intercept : Bicycle   | 0.25                       | 0.23-0.27               |
| Intercept :Motorcycle | 0.04                       | 0.03-0.05               |
| Intercept :MVC        | 0.84                       | 0.79-0.89               |
| Intercept :Other      | 0.35                       | 0.32-0.37               |
| Intercept :Pedestrian | 0.21                       | 0.19-0.23               |
| Intercept :Recreation | 0.05                       | 0.04-0.07               |
| Intercept :Ski        | 0.01                       | 0.00-0.01               |
| age: Assault          | 0.98                       | 0.97-0.98               |
| age:ATV               | 0.97                       | 0.97-0.98               |
| age : Bicycle         | 0.97                       | 0.97-0.97               |
| age :Motorcycle       | 0.98                       | 0.98-0.99               |
| age :MVC              | 0.98                       | 0.98-0.98               |
| age :Other            | 0.97                       | 0.97-0.98               |
| age :Pedestrian       | 0.99                       | 0.99-0.99               |
| age :Recreation       | 0.98                       | 0.97-0.98               |
| age :Ski              | 0.98                       | 0.97-0.98               |
| regionqc10: Assault   | 1.47                       | 0.69-3.11               |
| regionqc10:ATV        | 4.11                       | 2.28-7.38               |
| regionqc10: Bicycle   | 0.93                       | 0.44-1.97               |
| regionqc10:Motorcycle | 0.00                       | 0.00-Infinity           |
| regionqc10:MVC        | 1.18                       | 0.75-1.84               |
| regionqc10:Other      | 1.45                       | 0.84-2.50               |
| regionqc10:Pedestrian | 0.62                       | 0.22-1.71               |
| regionqc10:Recreation | 1.03                       | 0.14-7.50               |
| regionqc10:Ski        | 4.66                       | 1.12-19.37              |
| region17: Assault     | 11.77                      | 8.40-16.48              |
| region17:ATV          | 38.06                      | 28.40-51.00             |

|                     |       |             |
|---------------------|-------|-------------|
| region17: Bicycle   | 0.75  | 0.38-1.51   |
| region17:Motorcycle | 4.23  | 2.28-7.87   |
| region17:MVC        | 1.06  | 0.72-1.56   |
| region17:Other      | 1.40  | 0.88-2.23   |
| region17:Pedestrian | 2.40  | 1.51-3.83   |
| region17:Recreation | 1.13  | 0.27-4.63   |
| region17:Ski        | 32.77 | 18.59-57.78 |
| region18: Assault   | 10.69 | 6.81-16.80  |
| region18:ATV        | 6.06  | 3.38-10.87  |
| region18: Bicycle   | 1.00  | 0.44-2.25   |
| region18:Motorcycle | 0.00  | 0-Infinity  |
| region18:MVC        | 1.71  | 1.08-2.72   |
| region18:Other      | 0.71  | 0.32-1.60   |
| region18:Pedestrian | 0.60  | 0.18-1.94   |
| region18:Recreation | 5.88  | 2.29-15.13  |
| region18:Ski        | 34.20 | 16.97-68.94 |
| Sexmale: Assault    | 3.95  | 3.47-4.49   |
| Sexmale :ATV        | 3.09  | 2.69-3.56   |
| Sexmale : Bicycle   | 2.18  | 1.99-2.39   |
| Sexmale :Motorcycle | 2.69  | 2.27-3.19   |
| Sexmale :MVC        | 1.28  | 1.21-1.35   |
| Sexmale :Other      | 1.86  | 1.72-2.00   |
| Sexmale :Pedestrian | 0.79  | 0.73-0.86   |
| Sexmale :Recreation | 0.57  | 0.46-0.71   |
| Sexmale :Ski        | 3.12  | 2.14-4.54   |
