# Supplementary material
Source: PubMed Central journal article supplement (PMC4933602)
Supplement: supp_4.2.E249_2015-0105-4-at.pdf [file supp_4.2.E249_2015-0105-4-at.pdf]

**Appendix 4 (as supplied by the authors):** Association between mechanisms of injury by geographical zone in HR-18 using Poisson regression with robust variance estimation.

| <b>Population</b>                             | <b>Risk ratio</b> | <b>95% confidence interval</b> |
|-----------------------------------------------|-------------------|--------------------------------|
| <b>Off-road vehicles vs. other mechanisms</b> |                   |                                |
| Inland                                        | 1                 | Referent                       |
| Coastal                                       | 1.40              | 0.36 , 6.14                    |
| Remote                                        | 100.39            | 20.28 , 734.39                 |
| <b>Assaults vs. other mechanisms</b>          |                   |                                |
| Inland                                        | 1                 | Referent                       |
| Coastal                                       | 0.73              | 0.30 , 1.72                    |
| Remote                                        | 0.20              | 0.03 , 0.92                    |

Risk ratios were estimated using two Poisson regression models that adjusted for age, sex and year of injury. The methodology behind using the Poisson regression to estimate risk ratios in cohort studies is shown elsewhere.<sup>1</sup>

References

1. Zou GA. Modified Poisson regression approach to prospective studies with binary data. *Am J Epidemiol* 2004;159:702-6.
