# Supplementary material
Source: PubMed Central journal article supplement (PMC4933602)
Supplement: supp_4.2.E249_2015-0105-5-at.pdf [file supp_4.2.E249_2015-0105-5-at.pdf]

**Appendix 5 (as supplied by the authors):** Proportion of adults (secondary analysis) wearing protective equipment at the time of their traumatic brain injury hospitalization in the Terres-Cries-de-la-Baie-James.

**Proportion of adults (sub-analysis) wearing protective equipment by mechanism of injury in HR 18**

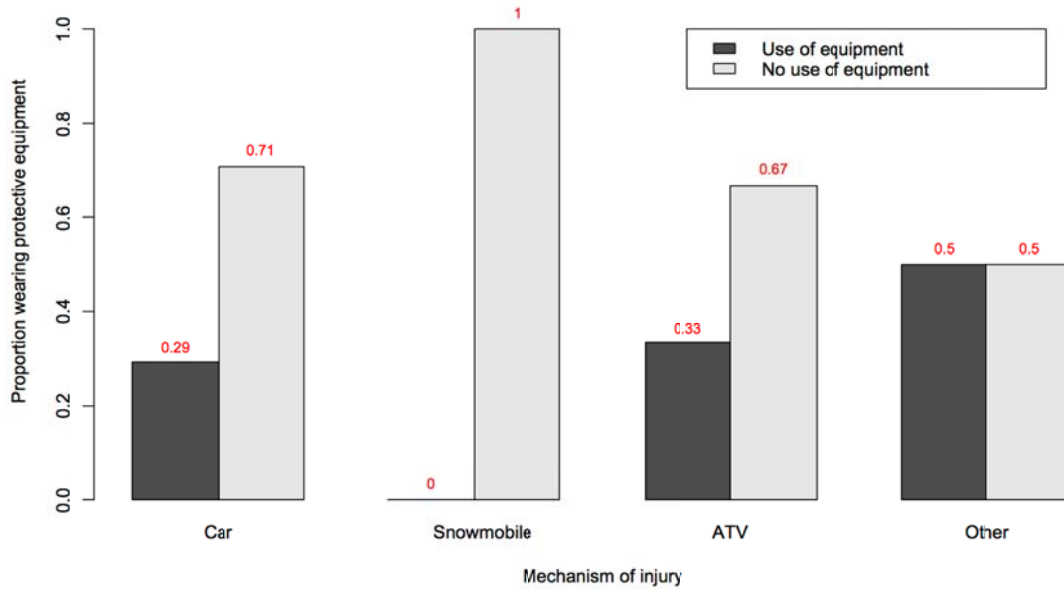

Patient involved in a recreational accident (sports/cycling) were the most likely to wear protective equipment. Most patients involved in motor vehicle collisions (car) and all-terrain vehicle collisions did not wear protective equipment (seatbelts and helmets, respectively). No patients involved in snowmobile accidents wore a helmet.
