# Supplementary material
Source: PubMed Central journal article supplement (PMC4933602)
Supplement: supp_4.2.E249_2015-0105-6-at.pdf [file supp_4.2.E249_2015-0105-6-at.pdf]

**Appendix 6 (as supplied by the authors):** Proportion of adults (secondary analysis) receiving rehabilitation by mechanism of injury in the Terres-Cries-de-la-Baie-James.

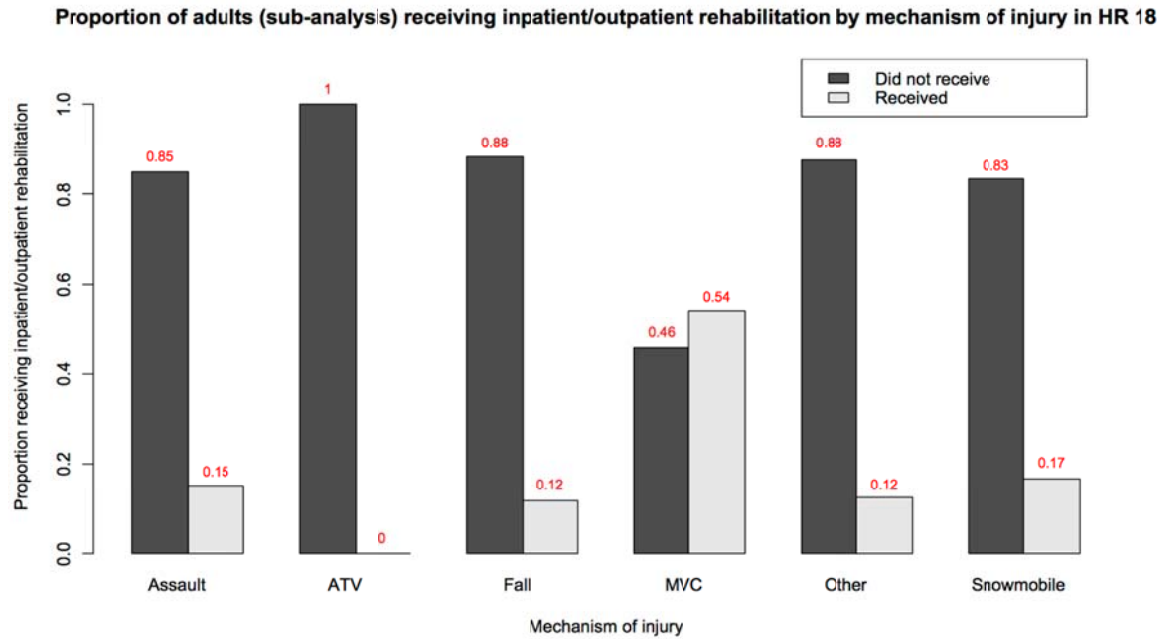

Adult patients that were involved in motor vehicle collisions were more likely to receive rehabilitation than all other mechanisms of injury. ATV = all-terrain vehicle collision, HR 18 = Terres-Cries-de-la-Baie-James health region, MVC = motor vehicle collision.
