# Supplementary material
Source: PubMed Central journal article supplement (PMC4933602)
Supplement: supp_4.2.E249_2015-0105-7-at.pdf [file supp_4.2.E249_2015-0105-7-at.pdf]

**Appendix 7 (as supplied by the authors):** Full regression model outputs from sub-analysis of the Terres-Cries-de-la-Baies-James adults from both multiply imputed and complete-case analysis models.

Table A [a]

Multiply imputed linear regression model output measuring the association between geographical zones and Glasgow Coma Scores in adults.

| GCS                 | Coef.     | Std. Err. | t     | P> t  | [95% Conf. Interval] |           |
|---------------------|-----------|-----------|-------|-------|----------------------|-----------|
| <b>Age category</b> |           |           |       |       |                      |           |
| (25-44)             | .1495839  | .5342778  | 0.28  | 0.780 | -.9157998            | 1.214968  |
| (45-64)             | .1352104  | .774715   | 0.17  | 0.862 | -1.405961            | 1.676382  |
| (65+)               | .046664   | 1.546537  | 0.03  | 0.976 | -3.086155            | 3.179483  |
| <b>Community</b>    |           |           |       |       |                      |           |
| Costal              | .1316434  | .5192619  | 0.25  | 0.801 | -.9033846            | 1.166671  |
| Remote              | -2.30882  | .9175332  | -2.52 | 0.015 | -4.147157            | -.470482  |
| <b>Alcohol</b>      |           |           |       |       |                      |           |
| Gender(Male)        | -1.194215 | .5110665  | -2.34 | 0.022 | -2.213757            | -.1746734 |
|                     | -.5769491 | .5342684  | -1.08 | 0.284 | -1.643619            | .4897203  |
| <b>Mechanism</b>    |           |           |       |       |                      |           |
| Assault             | 1.009533  | .8307405  | 1.22  | 0.229 | -.6551392            | 2.674206  |
| Off-road            | 1.518098  | 1.044063  | 1.45  | 0.151 | -.5688823            | 3.605077  |
| Other               | .6060946  | 1.002038  | 0.60  | 0.548 | -1.409113            | 2.621302  |
| Motor vehicle       | .5484793  | .7785064  | 0.70  | 0.484 | -1.006019            | 2.102977  |

Output for linear regression model assessing the association between geographical zones and initial injury severity, adjusted for all the covariates listed. The referent for age was the 15-24 age group and for mechanism of injury was falls. See below for the complete-case analysis. The estimates for the years of injury and the intercept are omitted for brevity.

Table A (b)

Complete-case linear regression model output measuring the association between geographical zones and Glasgow Coma Score in adults.

| GCS                 | Coef.     | Std. Err. | t     | P> t  | [95% Conf. Interval] |           |
|---------------------|-----------|-----------|-------|-------|----------------------|-----------|
| <b>Age category</b> |           |           |       |       |                      |           |
| (25-44)             | .2930595  | .5639484  | 0.52  | 0.605 | -.8308881            | 1.417007  |
| (45-65)             | .4995447  | .8209905  | 0.61  | 0.545 | -1.136687            | 2.135776  |
| (65+)               | .0192051  | 1.629347  | 0.01  | 0.991 | -3.228078            | 3.266488  |
| <b>Community</b>    |           |           |       |       |                      |           |
| Coastal             | .1449439  | .5351414  | 0.27  | 0.787 | -.9215914            | 1.211479  |
| Remote              | -2.822508 | .9686019  | -2.91 | 0.005 | -4.752929            | -.8920876 |
| <b>Alcohol(Yes)</b> | -1.185463 | .5055461  | -2.34 | 0.022 | -2.193015            | -.1779115 |
| <b>Gender(male)</b> | -.5697337 | .5430421  | -1.05 | 0.298 | -1.652015            | .5125476  |
| <b>Mechanism</b>    |           |           |       |       |                      |           |
| Assault             | 1.267178  | .8421157  | 1.50  | 0.137 | -.4111562            | 2.945512  |
| Off-road            | 2.302888  | 1.109783  | 2.08  | 0.042 | .0910943             | 4.514682  |
| Other               | .6274106  | 1.075344  | 0.58  | 0.561 | -1.515747            | 2.770568  |
| Motor vehicle       | .6980587  | .8279417  | 0.84  | 0.402 | -.9520267            | 2.348144  |

Table B (a)

Multiply imputed linear regression model output measuring the association between protective equipment use and initial Glasgow Coma Score in adults.

| GCS                   | Coef.     | Std. Err. | t     | P> t  | [95% Conf. Interval] |          |
|-----------------------|-----------|-----------|-------|-------|----------------------|----------|
| <b>Age category</b>   |           |           |       |       |                      |          |
| (25-44)               | .5847984  | .7510519  | 0.78  | 0.441 | -.9331342            | 2.102731 |
| (45-64)               | .6478025  | 1.231495  | 0.53  | 0.602 | -1.841145            | 3.13675  |
| <b>Gender(Male)</b>   | .5265729  | .6678019  | 0.79  | 0.435 | -.823105             | 1.876251 |
| <b>Protection</b>     | 1.195002  | .7420395  | 1.61  | 0.115 | -.304716             | 2.69472  |
| <b>Alcohol</b>        | -.1970675 | .7334449  | -0.27 | 0.790 | -1.679415            | 1.28528  |
| <b>Mechanism(MVC)</b> | .1286438  | .7010831  | 0.18  | 0.855 | -1.288298            | 1.545586 |

Output for linear regression model assessing the association of protective equipment with initial injury severity and adjusted for the covariates listed. This model was only used on patients that had a mechanism of injury where protective equipment could be used (e.g.: off-road vehicles and motor vehicle collisions). There were no patients that were 65 years or older or that had another mechanism of injury where protection could be worn. The referent group for age is 15-24 years and is off-road vehicles (all-terrain vehicles and snowmobiles) for the mechanism of injury variable. The estimates for the intercept and the year of injury covariates are omitted for brevity. See below for the complete-case analysis.

Table B (b)

Complete-case linear regression model output measuring the association between protective equipment use and initial Glasgow Coma Score in adults.

| GCS                    | Coef.     | Std. Err. | t     | P> t  | [95% Conf. Interval] |          |
|------------------------|-----------|-----------|-------|-------|----------------------|----------|
| <b>Age category</b>    |           |           |       |       |                      |          |
| (25-44)                | .4084069  | .8728054  | 0.47  | 0.643 | -1.376681            | 2.193494 |
| (45-64)                | .4660294  | 1.278243  | 0.36  | 0.718 | -2.148271            | 3.08033  |
| <b>Gender (Male)</b>   | .0038971  | .7570458  | 0.01  | 0.996 | -1.544435            | 1.552229 |
| <b>Protection</b>      | 1.544804  | .854958   | 1.81  | 0.081 | -.2037815            | 3.293389 |
| <b>Alcohol</b>         | -.4962255 | .8079181  | -0.61 | 0.544 | -2.148603            | 1.156152 |
| <b>Mechanism (MVC)</b> | .3927941  | .8274541  | 0.47  | 0.639 | -1.29954             | 2.085128 |

Table C (a)

Multiply imputed proportional odds logistic regression model output measuring the association between protective equipment use and Glasgow Outcome Score 6 months after injury in adults.

| GOS                    | Odds Ratio | Std. Err. | z     | P> z  | [95% Conf. Interval] |
|------------------------|------------|-----------|-------|-------|----------------------|
| <b>Age category</b>    |            |           |       |       |                      |
| (25-44)                | .6834096   | .5384292  | -0.48 | 0.629 | .1459002 3.201153    |
| (45-64)                | .1085947   | .1503728  | -1.60 | 0.109 | .0071967 1.63863     |
| <b>Gender (Male)</b>   | 1.596273   | 1.083027  | 0.69  | 0.491 | .4222703 6.034258    |
| <b>Protection</b>      | 4.790878   | 3.551376  | 2.11  | 0.035 | 1.120566 20.48296    |
| <b>Alcohol</b>         | 1.613462   | 1.124198  | 0.69  | 0.492 | .4117886 6.321832    |
| <b>Mechanism (MVC)</b> |            |           |       |       |                      |
|                        | 1.594291   | 1.245107  | 0.60  | 0.550 | .3449829 7.3678      |
| <b>Comorbidity</b>     | 1.15386    | 1.217273  | 0.14  | 0.892 | .145939 9.122938     |
| <b>Polytrauma</b>      | 1.010633   | .8354966  | 0.01  | 0.990 | .19994 5.108427      |

Output for proportional odds logistic regression measuring the association between protective equipment use and functional outcome at 6 months as measured on the Glasgow Outcome Scores and adjusted for all of the listed covariates. This model was only used on patients that had a mechanism of injury where protective equipment could be used (e.g.: off-road vehicles and motor vehicle collisions). There were no patients that were 65 years or older or that had another mechanism of injury where protection could be used. The proportional odds model was used since the proportionality assumption was met after running a cumulative odds logistic model. The referent group for age is 15-24 years and is off-road vehicles (all-terrain vehicles and snowmobiles) for the mechanism of injury variable. The estimates for the intercept and the year of injury covariates are omitted for brevity. See below for the complete-case analysis.

Table C (b)

Complete-case proportional odds logistic regression model output measuring the association between protective equipment use and Glasgow Outcome Score 6 months after injury in adults.

| GOS                    | Odds Ratio | Std. Err. | z     | P> z  | [95% Conf. Interval] |          |
|------------------------|------------|-----------|-------|-------|----------------------|----------|
| <b>Age category</b>    |            |           |       |       |                      |          |
| (25-44)                | .6065034   | .5104854  | -0.59 | 0.552 | .1165169             | 3.157022 |
| (45-64)                | .0859972   | .1233464  | -1.71 | 0.087 | .0051713             | 1.430108 |
| <b>Gender (Male)</b>   | 2.011829   | 1.474879  | 0.95  | 0.340 | .4781587             | 8.464667 |
| <b>Protection</b>      | 7.513794   | 6.36555   | 2.38  | 0.017 | 1.428028             | 39.53501 |
| <b>Alcohol</b>         | 1.286902   | .9760241  | 0.33  | 0.739 | .2910509             | 5.690124 |
| <b>Mechanism (MVC)</b> | 2.391205   | 2.092829  | 1.00  | 0.319 | .4301594             | 13.29244 |
| <b>Comorbidity</b>     | 1.418903   | 1.523686  | 0.33  | 0.745 | .1729386             | 11.64162 |
| <b>Polytrauma</b>      | .6139271   | .5490412  | -0.55 | 0.585 | .1063846             | 3.542868 |

Table D (a)

Multiply imputed proportional odds logistic regression model measuring the association between initial Glasgow Coma Score and Glasgow Outcome Score 6 months after injury in adults.

| GOS                 | Coef.     | Std. Err. | t     | P> t  | [95% Conf. Interval] |           |
|---------------------|-----------|-----------|-------|-------|----------------------|-----------|
| <b>Age category</b> |           |           |       |       |                      |           |
| (25-44)             | -1.046684 | .5584644  | -1.87 | 0.062 | -2.1478              | .0544313  |
| (45-64)             | -2.359514 | .8682029  | -2.72 | 0.007 | -4.066316            | -.6527119 |
| (65+)               | -4.866583 | 2.067581  | -2.35 | 0.022 | -9.009508            | -.7236566 |
| <b>Comorbidity</b>  | .5908515  | .784323   | 0.75  | 0.453 | -.960433             | 2.142136  |
| <b>Alcohol</b>      | .2214743  | .4914877  | 0.45  | 0.653 | -.7447098            | 1.187658  |
| <b>Gender(male)</b> | .9862258  | .593194   | 1.66  | 0.099 | -.1874487            | 2.1599    |
| <b>Mechanism</b>    |           |           |       |       |                      |           |
| Assault             | -.4603804 | .9699366  | -0.47 | 0.637 | -2.395316            | 1.474555  |
| Off-road            | -1.037653 | 1.069292  | -0.97 | 0.335 | -3.168586            | 1.093281  |
| Other               | -.3991143 | 1.01703   | -0.39 | 0.696 | -2.415609            | 1.61738   |
| Motor vehicle       | -.277041  | .9184912  | -0.30 | 0.764 | -2.102233            | 1.548151  |
| <b>Polytrauma</b>   | -.4034144 | .498491   | -0.81 | 0.419 | -1.383383            | .5765542  |
| <b>GCS</b>          | .5861763  | .14433    | 4.06  | 0.000 | .2999657             | .8723868  |

Output for proportional odds logistic regression measuring the association between initial Glasgow Coma Score and functional outcome at 6 months as measured on the Glasgow Outcome Score and adjusted for all of the listed covariates (and year of injury). The proportional odds model was used since the proportionality assumption was met after running a cumulative odds logistic model. The referent group for age is 15-24 years and is falls for the mechanism of injury variable. The intercept and year of injury estimates are omitted for brevity. See below for the complete-analysis regression output. Log-odds ratios are provided in this output.

Table D (b)

Complete-case proportional odds logistic regression model measuring the association between initial Glasgow Coma Score and Glasgow Outcome Score 6 months after injury in adults.

| GOS                 | Coef.     | Std. Err. | z     | P> z  | [95% Conf. Interval] |           |
|---------------------|-----------|-----------|-------|-------|----------------------|-----------|
| <b>Age category</b> |           |           |       |       |                      |           |
| (25-44)             | -1.009255 | .5785594  | -1.74 | 0.081 | -2.14321             | .124701   |
| (45-64)             | -2.84667  | 1.052202  | -2.71 | 0.007 | -4.908948            | -.7843916 |
| (65+)               | -6.100564 | 1.930666  | -3.16 | 0.002 | -9.8846              | -2.316528 |
| <b>Comorbidity</b>  | .5372575  | .8203359  | 0.65  | 0.513 | -1.070571            | 2.145086  |
| <b>Alcohol(Yes)</b> | .1807102  | .5167427  | 0.35  | 0.727 | -.8320869            | 1.193507  |
| <b>Gender(Male)</b> | 1.171079  | .5820868  | 2.01  | 0.044 | .0302101             | 2.311948  |
| <b>Mechanism</b>    |           |           |       |       |                      |           |
| Assault             | -.7583615 | .8917988  | -0.85 | 0.395 | -2.506255            | .9895319  |
| Off-road            | -1.442851 | 1.004124  | -1.44 | 0.151 | -3.410899            | .5251961  |
| Other               | -.6681344 | 1.12818   | -0.59 | 0.554 | -2.879327            | 1.543058  |
| Motor vehicle       | -.4470825 | .9099224  | -0.49 | 0.623 | -2.230498            | 1.336333  |
| <b>Polytrauma</b>   | -.3995757 | .5459089  | -0.73 | 0.464 | -1.469538            | .670386   |
| <b>GCS</b>          | .6828095  | .1524424  | 4.48  | 0.000 | .3840279             | .9815913  |



Table E (a)

Multiply imputed Poisson regression model measuring the association between mechanism of injury and the use of rehabilitation services in adults.

| Rehab               | Coef.     | Robust Std. Err. | z     | P> z  | [95% Conf. Interval] |           |
|---------------------|-----------|------------------|-------|-------|----------------------|-----------|
| <b>Age category</b> |           |                  |       |       |                      |           |
| (25-44)             | .4861944  | .4264952         | 1.14  | 0.255 | -.3523197            | 1.324709  |
| (45-64)             | .9390032  | .5579249         | 1.68  | 0.093 | -.158045             | 2.036051  |
| (65+)               | .8912483  | .9659215         | 0.92  | 0.359 | -1.02782             | 2.810316  |
| <b>Comorbidity</b>  | .0543161  | .3430599         | 0.16  | 0.874 | -.6202092            | .7288413  |
| <b>Gender(Male)</b> | -.2766505 | .3031753         | -0.91 | 0.362 | -.8726788            | .3193778  |
| <b>Mechanism</b>    |           |                  |       |       |                      |           |
| Assault             | .2382738  | .5733068         | 0.42  | 0.678 | -.8956887            | 1.372236  |
| Off-road            | .1124868  | .7947154         | 0.14  | 0.888 | -1.450518            | 1.675492  |
| Other               | .4097496  | .5193544         | 0.79  | 0.431 | -.6166818            | 1.436181  |
| Motor vehicle       | 1.069566  | .5182807         | 2.06  | 0.042 | .0389449             | 2.100186  |
| <b>GCS</b>          | -.2030924 | .0761935         | -2.67 | 0.008 | -.3534298            | -.0527551 |
| <b>Community</b>    |           |                  |       |       |                      |           |
| Coastal             | -.0383626 | .3084818         | -0.12 | 0.901 | -.6438167            | .5670914  |
| Remote              | -.1696769 | .6492008         | -0.26 | 0.794 | -1.447674            | 1.10832   |

Output for Poisson regression model to estimate the association between traumatic brain injury patients' mechanism of injury and their probability of receiving rehabilitation services. A robust variance estimator was used to estimate a risk ratio since the outcome was common.[1] The referent group for the age group is 15-24 years of age and for mechanism of injury is falls. The estimates for the year of injury and the intercept are omitted for brevity. Log-risk ratios are provided in this output.

### Reference

1. Zou G. A modified poisson regression approach to prospective studies with binary data. *Am J Epidemiol* 2004;159:702-6.

Table E (b)

Complete-case Poisson regression model measuring the association between mechanism of injury and the use of rehabilitation services in adults.

| Rehab               | Coef.     | Robust Std. Err. | z     | P> z  | [95% Conf. Interval] |           |
|---------------------|-----------|------------------|-------|-------|----------------------|-----------|
| <b>Age Category</b> |           |                  |       |       |                      |           |
| (25-44)             | .7111967  | .4827668         | 1.47  | 0.141 | -.2350088            | 1.657402  |
| (45-64)             | 1.346545  | .6278335         | 2.14  | 0.032 | .1160145             | 2.577077  |
| (65+)               | 1.437507  | .9348365         | 1.54  | 0.124 | -.3947387            | 3.269753  |
| <b>Comorbidity</b>  | -.095115  | .3380095         | -0.28 | 0.778 | -.7576024            | .5673704  |
| <b>Gender(Male)</b> | -.1380785 | .3344147         | -0.41 | 0.680 | -.7935194            | .5173622  |
| <b>Mechanism</b>    |           |                  |       |       |                      |           |
| Assault             | .5446015  | .5383662         | 1.01  | 0.312 | -.5105768            | 1.59978   |
| Off-road            | .2401137  | .7313095         | 0.33  | 0.743 | -1.193227            | 1.673454  |
| Other               | .64887    | .5979313         | 1.09  | 0.278 | -.5230538            | 1.820794  |
| Motor vehicle       | 1.538424  | .4553325         | 3.38  | 0.001 | .6459893             | 2.43086   |
| <b>GCS</b>          | -.2318583 | .0725399         | -3.20 | 0.001 | -.3740345            | -.0896832 |
| <b>Community</b>    |           |                  |       |       |                      |           |
| Coastal             | -.1145462 | .305718          | -0.37 | 0.708 | -.7137423            | .48465    |
| Remote              | -.0340984 | .642393          | -0.05 | 0.958 | -1.293166            | 1.224969  |

Table F (a)

Multiply imputed Poisson regression model measuring the association between mechanism of injury and alcohol intoxication at the time of injury in adults.

| Alcohol             | Coef.     | Robust<br>Std. Err. | z     | P> z  | [95% Conf. Interval] |          |
|---------------------|-----------|---------------------|-------|-------|----------------------|----------|
| <b>Age category</b> |           |                     |       |       |                      |          |
| (25-44)             | -.2062701 | .1817863            | -1.13 | 0.257 | -.5632147            | .1506744 |
| (45-64)             | -1.075992 | .4151679            | -2.59 | 0.010 | -1.89005             | -.261934 |
| <b>Gender(Male)</b> | -.0750727 | .1764657            | -0.43 | 0.671 | -.4213611            | .2712157 |
| <b>Mechanism</b>    |           |                     |       |       |                      |          |
| Assault             | .4787974  | .3351488            | 1.43  | 0.154 | -.1792956            | 1.13689  |
| Off-road            | .2227497  | .4173463            | 0.53  | 0.594 | -.5984421            | 1.043941 |
| Other               | .1495084  | .3804622            | 0.39  | 0.694 | -.5976883            | .8967051 |
| Motor vehicle       | .3070348  | .3365935            | 0.91  | 0.362 | -.3533604            | .96743   |
| <b>Community</b>    |           |                     |       |       |                      |          |
| Coastal             | .0076607  | .1850372            | 0.04  | 0.967 | -.3556648            | .3709862 |
| Remote              | -.3098327 | .4227104            | -0.73 | 0.465 | -1.143781            | .5241152 |

Output for Poisson regression model to estimate the association between traumatic brain injury patients' mechanism of injury and being intoxicated with alcohol at the time of injury. A robust variance estimator was used to estimate a risk ratio since the outcome was common.[1] The referent group for the age group is 15-24 years of age and for mechanism of injury is falls. No patients 65 years or older were intoxicated at the time of injury. See below for the complete-case analysis regression output. The estimates for the year of injury and the intercept are omitted for brevity. Log-risk ratios are provided in this output.

## Reference

1. Zou G. A modified poisson regression approach to prospective studies with binary data. *Am J Epidemiol* 2004;159:702-6.

Table F (b)

Complete-case Poisson regression model measuring the association between mechanism of injury and alcohol intoxication at the time of injury in adults.

| Alcohol             | Coef.     | Robust<br>Std. Err. | z     | P> z  | [95% Conf. Interval] |           |
|---------------------|-----------|---------------------|-------|-------|----------------------|-----------|
| <b>Age Category</b> |           |                     |       |       |                      |           |
| (25-44)             | -.1785693 | .19439              | -0.92 | 0.358 | -.5595668            | .2024282  |
| (45-64)             | -1.030997 | .4234852            | -2.43 | 0.015 | -1.861013            | -.2009812 |
| <b>Gender(Male)</b> | -.0977746 | .1896799            | -0.52 | 0.606 | -.4695404            | .2739913  |
| <b>Mechanism</b>    |           |                     |       |       |                      |           |
| Assault             | .5406546  | .3643645            | 1.48  | 0.138 | -.1734866            | 1.254796  |
| Off-road            | .3352614  | .4372242            | 0.77  | 0.443 | -.5216822            | 1.192205  |
| Other               | .1998267  | .4929524            | 0.41  | 0.685 | -.7663423            | 1.165996  |
| Motor vehicle       | .3601775  | .3913754            | 0.92  | 0.357 | -.4069042            | 1.127259  |
| <b>Community</b>    |           |                     |       |       |                      |           |
| Coastal             | -.0021408 | .1791631            | -0.01 | 0.990 | -.353294             | .3490123  |
| Remote              | -.3729487 | .4752533            | -0.78 | 0.433 | -1.304428            | .5585307  |
