# Supplementary material
Source: PubMed Central journal article supplement (PMC4933602)
Supplement: supp_4.2.E249_2015-0105-8-at.pdf [file supp_4.2.E249_2015-0105-8-at.pdf]

**Appendix 8 (as supplied by the authors):** Comparison of the distribution of traumatic brain injury severities amongst hospitalized patients in the Terres-Cries-de-la-Baies-James and Montréal.

| Population                                    | Traumatic brain injury hospitalization by injury severity (%) |                 |               |
|-----------------------------------------------|---------------------------------------------------------------|-----------------|---------------|
|                                               | <i>Mild</i>                                                   | <i>Moderate</i> | <i>Severe</i> |
| <b>Montréal (urban)</b>                       | 5467 (83.6)                                                   | 388 (5.9)       | 681 (10.4)    |
| <b>Terres-Cries-de-la-Baies-James (rural)</b> | 81 (83.5)                                                     | 7 (7.2)         | 9 (9.2)       |
| $\chi^2=0.38$<br>df=2<br>$p = 0.83$           |                                                               |                 |               |

This sensitivity analysis was done to investigate whether or not the incidence rates calculated for the Terres-Cries-de-la-Baie-James were biased because of different hospitalization practices in the rural setting compared to the urban setting. These proportions are for the time-period of 2000-2012.
