# Supplementary material
Source: PubMed Central journal article supplement (PMC4933602)
Supplement: supp_4.2.E249_2015-0105_original_submission.pdf [file supp_4.2.E249_2015-0105_original_submission.pdf]

Traumatic brain injury in a rural indigenous population in  
Canada: a community-based approach to surveillance

Oliver Lasry (MDCM, MSc)<sup>1,2</sup>, Roy W Dudley (MD, PhD)<sup>3</sup>, Rebecca  
Fuhrer (PhD)<sup>1</sup>, Jill Torrie (MA)<sup>4</sup>, Robert Carlin (MDCM)<sup>5</sup>,  
Judith Marcoux (MD, MSc)<sup>2</sup>

**Author Affiliations:**

1. Department of Epidemiology, Biostatistics and Occupational Health, McGill University, 1020 Pine Avenue West, Montréal, Québec, H3A 1A2, Canada
2. Department of Neurosurgery, McGill University Health Centre - Montreal General Hospital, 1650 Cedar Avenue, Montréal, Québec, H3G 1A4, Canada
3. Department of Surgery, Division of Neurosurgery, McGill University Health Centre - Montreal Children's Hospital, 1001 Décarie Boulevard, Montréal, Québec, H4A 3J1, Canada
4. Department of Public Health, Cree Board of Health and Social Services of James Bay, 203 Mistissini Boulevard, Mistissini, Québec, G0W 1C0, Canada
5. Department of Public Health, Cree Board of Health and Social Services of James Bay, 277 Duke Street, Suite 201, Montréal, Québec, H3C 2M2, Canada

**Email addresses (phone number):**

[oliver.lasry@mail.mcgill.ca](mailto:oliver.lasry@mail.mcgill.ca)  
[roy.dudley@mcgill.ca](mailto:roy.dudley@mcgill.ca)  
[rebecca.fuhrer@mcgill.ca](mailto:rebecca.fuhrer@mcgill.ca)  
[torrie.jill@ssss.gouv.qc.ca](mailto:torrie.jill@ssss.gouv.qc.ca)  
[robert.carlin@ssss.gouv.qc.ca](mailto:robert.carlin@ssss.gouv.qc.ca)  
[judith.marcoux@mcgill.ca](mailto:judith.marcoux@mcgill.ca) (corresponding author - 514-934-1934)

**Word Count (abstract): 250 words**

**Word Count (manuscript): 2497 Words**

**Competing interests:**

The authors declare that they have no competing interests.

**Authors' contributions:**

OL conceived a part of the project in addition to developing the study design, methodology, abstracting primary data from patient charts, completing the data analysis and writing the manuscript. RWD conceived the project, helped with the study design and reviewed the manuscript. RF helped in organizing and designing the study, reviewed the methodology and data analysis used in the study as well as reviewing the manuscript. JT and RC helped in developing the study design, organizing and coordinating the study and reviewing the manuscript. They were also responsible for liaising with stakeholders of the communities under investigation to ensure that all content was culturally appropriate for the population of Eeyou Istchee. JM conceived the project with OL and RWD, developed the study design and methodology, reviewed the manuscript and was the main supervisor for OL's MSc degree.

**Acknowledgements:**

The authors would like to thank Pierre Lejeune from the CBHSSJB for helping with retrieving the data from the MED-ÉCHO database. In addition, the authors are grateful for all the time and effort that the archivists at each hospital contributed to retrieving charts that were used in this study.

**Funding sources:**

OL was funded by the Canadian Institutes for Health Research (CIHR) through the Canadian Graduates Scholarship program. He also received funding by the Régie de l'assurance maladie du Québec/Ministère de la Santé et des Services Sociaux du Québec through their "Année Complémentaire" program for residents enrolled in the Royal College of Physicians and Surgeons of Canada's Clinician-Investigator Program. OL also received funding from the CBHSSJB and McGill University's Faculty of Medicine to travel to the communities and to complete the data ascertainment component of the study. RF was funded by the CIHR Canada Research Chair in Psychosocial Epidemiology.

**Abstract**

*Background:* Indigenous populations are disproportionately affected by traumatic brain injury (TBI). These populations rely on large jurisdiction surveillance efforts to inform their prevention strategies, which may not always address their needs. This study aimed to describe the TBI epidemiology of a primarily indigenous region, Health Region 18 (HR-18), of Québec and compare it with two neighbouring regions and the entire province, in order to identify prevention strategy priorities for these communities that would be compared to recommendations from a province-wide surveillance initiative.

*Methods:* We conducted a retrospective, population-based cohort study of incident TBI hospitalizations in Québec, stratified by three neighboring rural and/or indigenous HRs between 2000–2012. Administrative hospitalization data were used for case finding. A sub-analysis of HR-18 adults was completed to assess for determinants of TBI severity/outcome. Regression models, multiple imputations, and a sensitivity analysis were used to assess for biased associations.

*Results:* 172 incident TBI hospitalizations, mainly caused by assaults, occurred in HR-18. The incidence rate was 92.1 per 100,000 person-years, which was 1.86 times (95% CI 1.56–2.17) higher than for the rest of the province. HR-18 rates

1  
2  
3 were higher than in a neighbouring non-indigenous population  
4  
5 but significantly lower than in a neighbouring indigenous  
6  
7 population. Adults using protective equipment had less  
8  
9 severe injuries and better functional outcomes. Patients  
10  
11 involved in motor vehicle collisions were most likely to  
12  
13 receive rehabilitation.  
14

15  
16  
17  
18 *Interpretation:* Community-based TBI surveillance provides  
19  
20 evidence that rural and indigenous communities can use to  
21  
22 prioritize pertinent prevention strategies, which may not be  
23  
24 possible with large jurisdiction surveillance initiatives.  
25  
26  
27  
28  
29  
30  
31  
32  
33  
34  
35  
36  
37  
38  
39  
40  
41  
42  
43  
44  
45  
46  
47  
48  
49  
50  
51  
52  
53  
54  
55  
56  
57  
58  
59  
60

## Background

Traumatic brain injury (TBI) heterogeneously affects populations around the globe. Rural populations tend to have higher TBI occurrence and worse outcomes.[1,2]. In Canada, the poorer health status of indigenous peoples compared to the general population has been described.[3,4] Injuries are the greatest cause for potential years of life lost in this population, with rates that are four times higher than for the rest of Canadians.[5,6] More specifically, TBI represents a significant proportion of these injuries in indigenous North-American populations.[7-10] Moreover, these populations have different risk factors related to the occurrence of trauma compared to other Canadians.[11,12] For example, the predominant mechanisms of injury associated with TBI are different in urban versus rural environments where many indigenous populations reside.[13] The spectrum of disability amongst different indigenous populations varies after injuries.[14] Given that the determinants of TBI occurrence and outcomes differ significantly between indigenous populations, surveillance conducted on a community-specific basis is likely to provide evidence that informs relevant prevention strategies for these communities.[3,15]

The Institut National de Santé Publique du Québec completed a provincial TBI surveillance study in 2012 on

1  
2  
3 non-intentional TBI hospitalizations and analyzed the data  
4 stratified by different health regions (HRs). This report  
5 concluded that the prevention of falls was a priority to  
6 reduce the provincial TBI disease burden. However, the two  
7 northern Québec HRs that represent indigenous communities  
8 (HR-17 - Nunavik and HR-18 - Terres-Cries-de-la-Baie-James  
9 which serves the Cree of Eeyou Istchee) and a non-indigenous  
10 region with a similar geographical milieu to the two  
11 aforementioned regions (HR-10-Nord-du-Québec) were excluded  
12 from their analysis.[16]  
13  
14  
15  
16  
17  
18  
19  
20  
21  
22  
23

24  
25  
26 The primary aim of our study was to compare and  
27 contrast the rates and determinants of TBI between Eeyou  
28 Istchee and both a neighboring indigenous (HR-17) and non-  
29 indigenous community (HR-10). A secondary aim of the study  
30 was to describe severity, risk factors, functional outcomes,  
31 and use of rehabilitation resources amongst adult TBI cases  
32 in Eeyou Istchee. This analysis would then be used to  
33 formulate which prevention strategies would be relevant to  
34 this region and compare them to those recommended through the  
35 above province-wide surveillance study.  
36  
37  
38  
39  
40  
41  
42  
43  
44  
45  
46  
47

## 48 **Methods**

49  
50  
51  
52 *Study design, population, and setting*  
53  
54  
55  
56  
57  
58  
59  
60

1  
2  
3 We conducted a population-based retrospective study of  
4 all hospitalized incident TBI cases from a single HR of  
5 Québec (HR-18) that represented the patients from a single  
6 indigenous population (Eeyou Istchee) from 2000-2012. The  
7 epidemiologic descriptions of two neighboring HRs (HR-17, a  
8 predominantly Inuit population, and HR-10, a predominantly  
9 non-indigenous population) and the rest of Québec were used  
10 as comparison populations (Figure 1).[17,18]  
11  
12  
13  
14  
15  
16  
17  
18  
19  
20

### 21 *Case definitions and primary outcome*

22  
23  
24  
25

26 The province of Québec provides public health care  
27 coverage to its residents. For case finding, we used a  
28 provincial hospitalization database, MED-ÉCHO, which records  
29 all hospitalizations in the province and categorizes people  
30 based on their residence in a specific HR [19]. This  
31 administrative database uses the International  
32 Classification of Disease 9 (ICD-9) coding scheme from 2000-  
33 2005, whereas from 2006-2012 the Canadian version of ICD-10  
34 was used. We used a similar case definition as the INSPQ to  
35 have comparable surveillance data to the rest of the  
36 province (Table 1).[16] However, intentional TBI cases were  
37 also included in this analysis since assaults are a  
38 prominent mechanism of injury in indigenous communities.[6]  
39  
40  
41  
42  
43  
44  
45  
46  
47  
48  
49  
50  
51  
52

53  
54 Since TBI severity/outcome is not homogeneously  
55 assessed amongst the pediatric and adult populations and TBI  
56  
57  
58  
59  
60

1  
2  
3 predominantly affects young adults in indigenous  
4 communities, a further analysis was completed in adults (15  
5 years or older).[20] These patients' charts were reviewed at  
6 all of the hospitals and clinics where they were treated for  
7 their incident head injury (Supplementary Figures s1 and  
8 s2).

#### 17 *Measured variables*

20  
21 The variables ascertained from MED-ÉCHO included the  
22 patient's age, gender, length of hospital stay, external  
23 cause of injury (mechanism of injury), primary and secondary  
24 diagnoses of the hospitalization, and the patient's  
25 HR/present municipality of origin. The external mechanisms  
26 of injury were coded as per the ICD-9/ICD-10-CA  
27 classifications (Table 1).[16] Using a data extraction form,  
28 a chart review was conducted by the primary author who has  
29 over 5 years experience as a neurosurgery resident and has  
30 training in epidemiology/biostatistics. The chart review was  
31 used to measure, amongst other variables (see Supplementary  
32 Methods s3), injury severity and outcome using the Glasgow  
33 Coma Scale and Glasgow Outcome Scale (GCS/GOS).[21,22]

#### 48 *Missing data*

51  
52  
53  
54 For the primary analysis, there were only missing data  
55 for mechanisms of injury for the entire Province of Québec  
56  
57  
58  
59  
60



1  
2  
3 (6.6%). A listwise deletion approach was used for regression  
4 analyses using these data since they were assumed to be  
5 missing completely at random. For the secondary analysis, if  
6 charts were not accessible, missing data were multiply  
7 imputed by chained equations using 20 datasets and 10  
8 iterations per dataset with the "R mi" package. [23]  
9  
10  
11  
12  
13  
14  
15

### 16 17 18 *Statistical analysis* 19

20  
21  
22 The denominator for the TBI incidence calculation was  
23 determined through census data provided by the Statistical  
24 Institute of Québec and the Ministry of Health and Social  
25 Services.[16,24,25] The incidence rates were standardized to  
26 the 1991 Québec population structure as was done in the  
27 province-wide surveillance project.[16] Adjusted incidence  
28 rate ratios (IRRs) were computed using negative binomial  
29 models (since the variance and mean of counts were not  
30 equal) between the study population and the three referent  
31 populations, while controlling for age, gender, and year of  
32 injury. Mechanisms of injury and their association to each  
33 region were assessed using the same adjustment covariates.  
34 Based on differing environments of HR-18, the region was  
35 divided into 3 groups: "inland", "coastal", and "remote"  
36 communities based on their relationship to James Bay  
37 (Supplementary Figure s1 and Methods s3). For the secondary  
38 objectives, six regression models were used to assess the  
39 association of certain risk factors with the occurrence or  
40  
41  
42  
43  
44  
45  
46  
47  
48  
49  
50  
51  
52  
53  
54  
55  
56  
57  
58  
59  
60

1  
2  
3 outcome of TBI and model selection techniques used are  
4 described in Supplementary Methods s3.  
5  
6  
7

8  
9 For all regression coefficient estimates from  
10 regression models, a 95% confidence interval was calculated.  
11 R version 3.0.3 for Mac OS X (R Foundation for Statistical  
12 Computing, 2012) and Stata 12.0 for Mac OS X (StataCorp,  
13 2011) statistical software were used for all data analysis.  
14 As described by Zou, to avoid biased large odds ratios, risk  
15 ratios were estimated using a Poisson regression model since  
16 the outcomes were common.[26]  
17  
18  
19  
20  
21  
22  
23  
24  
25  
26  
27

#### 28 *Sensitivity analysis*

29  
30  
31 Since the study was conducted in rural to remote  
32 populations, more hospitalizations may have occurred for  
33 milder injuries compared to an urban centre where hospital  
34 beds are proportionately more limited for a larger  
35 population. To assess for this bias, a sensitivity analysis  
36 was completed by measuring the proportion of mild, moderate,  
37 and severe TBI hospitalizations in the urban population of  
38 Montréal (HR-6) (seen as "Montréal" on Supplementary Figure  
39 s1) at a level 1 trauma centre and comparing it to HR-18  
40 (Supplementary Methods s3).  
41  
42  
43  
44  
45  
46  
47  
48  
49  
50  
51  
52

#### 53 *Ethics*

54  
55  
56  
57  
58  
59  
60

1  
2  
3 The Institutional Research Ethics Board of McGill  
4 University approved this study. The study conformed to the  
5 Tri-Council Policy Statement on Ethical Conduct for Research  
6 Involving Humans and First Nations, Inuit, or Métis people.  
7 [27] Each hospital where a chart review was completed had  
8 authorization from their Director of Professional Services.  
9 The Cree Board of Health and Social Services of James Bay  
10 Public Health Department partnered with the study, which was  
11 approved by the Public Health Management Committee.  
12  
13  
14  
15  
16  
17  
18  
19  
20  
21

## 22 **Results:**

23  
24  
25  
26  
27  
28 172 TBI hospitalizations occurred in HR-18 from 2000-  
29 2012, resulting in a crude incidence rate of 92.1 per  
30 100,000 person-years (Table 2). Mechanisms of injury were  
31 mainly related to assaults followed by falls, motor vehicle  
32 collisions, and off-road vehicle collisions. For most years,  
33 the standardized rates in HR-18 were higher than in the  
34 entire province (Figure 2a). The remote community had the  
35 highest rate of TBI hospitalizations followed by coastal and  
36 inland communities. The distribution of mechanisms of injury  
37 varied by age group with the youngest and oldest having  
38 falls as the most common mechanism (Figure 2b). Adjusted for  
39 relevant confounders, HR-17 had the highest incidence rates  
40 followed by HR-18 and HR-10 (Table 2).  
41  
42  
43  
44  
45  
46  
47  
48  
49  
50  
51  
52  
53  
54  
55  
56  
57  
58  
59  
60

1  
2  
3 The multinomial regression revealed that assaults were  
4 more strongly associated with HRs-18 and 17 than with HR-10  
5 and the rest of Québec (relative probability ratios of  
6 10.69, 11.77, and 1.47, respectively). ATV collisions were  
7 proportionately more frequent in HR-17 than in all other  
8 HRs. HRs-18 and 10 had similar relative probability ratios  
9 of these collisions, which were higher than in Québec  
10 (Supplementary Table s4). Similar results for snowmobile  
11 collisions were observed. Off-road vehicle collisions were  
12 more common in the remote community compared to inland and  
13 coastal communities (Supplementary Table s5 and Figure 2c).  
14  
15  
16  
17  
18  
19  
20  
21  
22  
23  
24  
25  
26  
27

28 There were 117 incident TBI hospitalizations for  
29 individuals 15 years or older between 2000–2012  
30 (Supplementary Table s6). In terms of injury severity, there  
31 were mainly mild TBI hospitalizations (83.5%) followed by  
32 severe and moderate TBI. The range of follow-up time for the  
33 GOS calculation was 5 to 14 months. Only 27% of patients who  
34 could have worn protective equipment did so. 55% of patients  
35 were reported as being intoxicated with alcohol at the time  
36 of their injury (Supplemental Figures s6 and s7).  
37  
38  
39  
40  
41  
42  
43  
44  
45  
46  
47

48 Patients in the remote community had more severe  
49 injuries than those in the other communities. Individuals  
50 wearing protective equipment tended to have less severe  
51 injuries and had a better outcome as assessed by the GOS.  
52 Patients involved in MVCs had a higher probability of  
53  
54  
55  
56  
57  
58  
59  
60

1  
2  
3 receiving rehabilitation than those with a mechanism of fall  
4 or assault (Table 3 and supplementary material s8).  
5  
6  
7

8  
9  
10 Supplementary Table s10 demonstrates that the severity  
11 distribution of TBI hospitalizations in HR-18 and HR-6 were  
12 similar. The latter provides evidence that the indications  
13 to hospitalize patients in the rural and urban setting were  
14 similar. Therefore, the comparison of rates between the  
15 rural setting and the rest of the province appears  
16 justified.  
17  
18  
19  
20  
21  
22  
23

#### 24 25 26 **Discussion:**

27  
28 This study demonstrates that the epidemiology of TBI  
29 for the entire province of Québec is different from its  
30 rural and indigenous communities. The rates of TBI are  
31 higher in these communities and the mechanisms of injury  
32 leading to TBI are significantly different. Moreover, we  
33 showed that varying geographical environments throughout  
34 these communities were important determinants of TBI  
35 occurrence and injury severity. The detailed analysis of  
36 adults living in Eeyou Istchee provided a better  
37 understanding of prevention strategies that would be useful  
38 to this community in addition to identifying inequalities in  
39 access to health care resources. Relying on province-wide  
40 surveillance initiatives failed to properly describe TBI  
41 epidemiology for this community.  
42  
43  
44  
45  
46  
47  
48  
49  
50  
51  
52  
53  
54  
55  
56  
57  
58  
59  
60

1  
2  
3 The heterogeneity of TBI epidemiology between  
4 populations has been reported in various jurisdictions and  
5 has been attributed to varying case definitions, data  
6 sources, and risk factors [28-31]. For example, the  
7 provinces of Ontario and Québec completed surveillance  
8 studies on TBI hospitalizations using similar ICD coding  
9 methodology.[16,32] Their rates tended to consistently  
10 decrease over a decade and to be no higher than 83.4 cases  
11 per 100,000 person-years. In contrast, the rates in Eeyou  
12 Istchee were consistently higher and did not decrease over  
13 time (Figure 2a).[9,16,32] Since our surveillance  
14 methodology was nearly identical to the latter studies', the  
15 main variation must be due to differing risk factors in  
16 these populations. Furthermore, these two provincial  
17 surveillance studies each concluded that preventing falls is  
18 a priority for reducing TBI burden across their populations.  
19 Although this recommendation may be useful for the HR-18  
20 population, it overlooks other important mechanisms of  
21 injury that could be the object of prevention strategies,  
22 such as assaults. Our analysis demonstrated that assaults  
23 were more common in the indigenous communities than non-  
24 indigenous communities in Québec. In Alberta and New  
25 Zealand, the main causes of TBI/trauma amongst indigenous  
26 and non-indigenous populations vary, with the indigenous  
27 populations being more affected by assaults.[6,13] In  
28 contrast, a study completed on TBI rehabilitation patients  
29 in Saskatchewan found no such association.[8] Briefly, the  
30  
31  
32  
33  
34  
35  
36  
37  
38  
39  
40  
41  
42  
43  
44  
45  
46  
47  
48  
49  
50  
51  
52  
53  
54  
55  
56  
57  
58  
59  
60

1  
2  
3 heterogeneity in TBI epidemiology between and within  
4 rural/indigenous communities can be explained by varying  
5 geographical environments. Varying cultural/social  
6 determinants, which were not the focus of this study, are  
7 probably important contributors as well. [33]  
8  
9  
10  
11  
12  
13

14  
15  
16 The detailed analysis of adult TBI cases was critical  
17 in understanding determinants of TBI severity and outcomes.  
18 For example, the main factor increasing the initial severity  
19 of TBI was living in a remote geographical zone. Previous  
20 research has demonstrated that individuals living in rural  
21 environments are more prone to transport-related accidents,  
22 which was substantiated by our findings [34]. Although  
23 mechanism of injury was controlled for, residual confounding  
24 of this association likely exists. The number of  
25 kilometers/time driven with off-road vehicles in this remote  
26 community is likely higher since they have no access to  
27 provincial roadways like the coastal/inland communities.  
28 However, the remote community of HR-18, set in the same  
29 remote environment as HR-17, had lower rates of TBI  
30 hospitalization. As above, there are probably other  
31 unmeasured cultural/social factors that play a role in TBI  
32 occurrence. Our study demonstrated that protective equipment  
33 use predicted a lower severity of injury and an improved  
34 functional outcome for HR-18 adults, which is supported by  
35 previous investigations confirming its efficacy. [35-37] Our  
36 analysis suggests that milder injuries and younger age were  
37  
38  
39  
40  
41  
42  
43  
44  
45  
46  
47  
48  
49  
50  
51  
52  
53  
54  
55  
56  
57  
58  
59  
60

1  
2  
3 associated with lesser use of rehabilitation services.  
4  
5 Patients in MVCs had a greater chance of receiving  
6  
7 rehabilitation than those with assaults or falls.  
8  
9 Rehabilitation services, across the spectrum of different  
10  
11 severity TBI, have been shown to improve victims' functional  
12  
13 outcomes.[38] These inequalities should be addressed with  
14  
15 policies that encourage providers and the health care system  
16  
17 to offer rehabilitation resources based on need.  
18  
19

20  
21 This study's strengths stem from its design of  
22  
23 comparing three neighboring indigenous/rural populations to  
24  
25 the greater population of the province where they  
26  
27 reside.[6,7] Two indigenous populations do not have the same  
28  
29 environmental, cultural, or socio-economic situations, but  
30  
31 they do have more similarities than to the general  
32  
33 population. Our design allowed us to partially control for  
34  
35 unmeasured covariates, which helped establish differences in  
36  
37 TBI occurrence at the local level (i.e. varying geographical  
38  
39 environments).[7-9,13,34] The thorough chart review  
40  
41 permitted a detailed analysis of community-specific risk  
42  
43 factors for TBI occurrence and outcome that is not feasible  
44  
45 when using administrative data. The sensitivity analysis  
46  
47 confirmed that incidence rates between urban and rural  
48  
49 settings in Québec were comparable.  
50  
51  
52  
53

54  
55 One limitation of this study is that case finding  
56  
57 relied on hospitalization data using ICD coding. ICD codes  
58  
59  
60



1  
2  
3 have also been known to be less sensitive at identifying  
4 mild TBI cases.[39] Mortality cases that were never  
5 hospitalized were not included in our analysis, which leads  
6 to more underestimation of incidence rates/mortality  
7 figures. Also, our population had GOS scores from 3 to 5.  
8 Out of the 97 patients with full data, 45 (46.3%) did not  
9 have a recorded GOS. For these cases, the chart extractor  
10 interpreted clinical follow-up notes to establish the GOS.  
11 However, this method of assigning the GOS has not been  
12 validated. A score of 3 may be easy to differentiate from  
13 higher scores, but there may have been misclassification  
14 between scores of 4 and 5 because of subtleties that cannot  
15 be ascertained from a chart. If this misclassification were  
16 non-differential, the magnitudes of our association measures  
17 would be biased towards the null.  
18  
19  
20  
21  
22  
23  
24  
25  
26  
27  
28  
29  
30  
31  
32  
33  
34  
35

### 36 **Conclusions:**

37  
38  
39  
40 Large jurisdiction surveillance efforts cannot always  
41 capture accurately the determinants of TBI for indigenous  
42 and rural communities. Community-based surveillance efforts  
43 should be encouraged in these communities so that evidence  
44 that informs relevant prevention strategies is available.  
45  
46  
47  
48  
49  
50  
51  
52  
53  
54  
55  
56  
57  
58  
59  
60  
Lastly, this surveillance approach would allow further  
research on the cultural and social determinants of TBI,  
which is necessary to further tailor prevention strategies  
to individual communities.

**References**

1. Hyder A, Wunderlich CA, Puvanachandra P, et al. NeuroRehabilitation. The impact of traumatic brain injuries: a global perspective. *NeuroRehabilitation* 2007;22:341-53.
2. Zhao YD, Wang W. Neurosurgical trauma in People's Republic of China. *World J Surg* 2001;25:1202-1204.
3. MacMillan HL, MacMillan AB, Offord DR, et al. Aboriginal health. *CMAJ* 1996;155:1569-1578.
4. Greenwood ML, de Leeuw SN. Social determinants of health and the future well-being of Aboriginal children in Canada. *Paediatr Child Health* 2012;17:381-384.
5. Improving the Health of Canadians 2004. Ottawa (ON): Canadian Institute for Health Information; 2004. Available: <https://secure.cihi.ca/estore/productSeries.htm?pc=PCC180> (accessed 2015 May 16).
6. Karmali S, Laupland K, Harrop AR, et al. Epidemiology of severe trauma among status Aboriginal Canadians: a population-based study. *CMAJ* 2005;172:1007-11.
7. Rutland-Brown W, Wallace LJ, Faul M, et al. Traumatic brain injury hospitalizations among American Indians/Alaska Natives. *J Head Trauma Rehabil* 2005; 20:205-214.
8. Blackmer J, Marshall SC. A comparison of traumatic brain injury in the Saskatchewan native North American and non-native North American populations. *BrainInj*. 1999;13:627-35.
9. Langlois JA, Kegler SR, Butler JA, et al. Traumatic brain injury-related hospital discharges. Results from a 14-state surveillance system, 1997. *MMWR SurveillSumm* 2003;52:1-20.

- 1  
2  
3 10. Coronado VG, Xu L, Basavaraju SV, et al. Surveillance  
4 for traumatic brain injury-related deaths--United States,  
5 1997-2007. *MMWR SurveillSumm* 2011;60:1-32.  
6  
7  
8  
9  
10 11. Desapriya E, Han G, Jivani K, et al. Motor vehicle  
11 crashes and occupant restraint use among Aboriginal  
12 populations in BC. Vancouver (BC): BC Injury Research and  
13 Prevention Unit; 2008. Available:  
14 [http://data.injuryresearch.bc.ca/admin/DocUpload/3\\_20090612\\_121856Aboriginal%20Restraint%20Use%20Report\\_Apr.22%20Edi%20a](http://data.injuryresearch.bc.ca/admin/DocUpload/3_20090612_121856Aboriginal%20Restraint%20Use%20Report_Apr.22%20Edi%20a.pdf)  
15 [.pdf](http://data.injuryresearch.bc.ca/admin/DocUpload/3_20090612_121856Aboriginal%20Restraint%20Use%20Report_Apr.22%20Edi%20a.pdf) (accessed 2015 May 14).  
16  
17  
18  
19  
20  
21  
22  
23 12. Desapriya E, Fujiwara T, Verma P, et al. Comparison of  
24 on-reserve road versus off-reserve road motor vehicle  
25 crashes in Saskatchewan, Canada: a case control study. *Asia*  
26 *Pac J Public Health* 2011;23:1005-1020.  
27  
28  
29  
30  
31  
32 13. Feigin VL, Theadom A, Barker-Collo S, et al. Incidence  
33 of traumatic brain injury in New Zealand: a population-based  
34 study. *Lancet Neurol* 2003;12:53-64.  
35  
36  
37  
38 14. Langlois JA, Rutland-Brown W, Thomas KE. The incidence  
39 of traumatic brain injury among children in the United  
40 States: differences by race. *J Head Trauma Rehabil*  
41 2005;20:229-238.  
42  
43  
44  
45  
46 15. Auer AM, Andersson R. Canadian Aboriginal communities: a  
47 framework for injury surveillance. *Health Promotion*  
48 *International* 2001;16:169-177.  
49  
50  
51  
52 16. Gagné M, Robitaille Y, Légaré G, et al. Évolution des  
53 hospitalisations attribuables aux traumatismes  
54 craniocérébraux d'origine non intentionnelle au Québec.  
55  
56  
57  
58  
59  
60

- 1  
2  
3 Québec (QC): Institut national de santé publique du Québec;  
4  
5 2012. Available:  
6  
7 [http://www.inspq.qc.ca/pdf/publications/1473\\_EvolHospitaAttr](http://www.inspq.qc.ca/pdf/publications/1473_EvolHospitaAttr)  
8  
9 [ibuTCCNonIntentQc.pdf](http://www.inspq.qc.ca/pdf/publications/1473_EvolHospitaAttr) (accessed 2015 13 May).  
10  
11 17. Zorion. Nord-du-Québec.gif. Wikimedia Commons; 2010.  
12 Available: <http://commons.wikimedia.org/wiki/File:Nord-du->  
13 [Québec.gif](http://commons.wikimedia.org/wiki/File:Nord-du-) (accessed 2015 14 May).  
14  
15 18. James Bay Northern Quebec Agreement. Nemaska (QC): Grand  
16 Council of the Crees; 1975. Available:  
17  
18 <http://www.gcc.ca/pdf/LEG000000006.pdf> (accessed 2015 12  
19 May).  
20  
21 19. Banque de données ministérielles MED-ÉCHO. Québec (QC):  
22 Régie de l'assurance maladie du Québec; 2014. Available:  
23  
24 <http://www.ramq.gouv.qc.ca/fr/donnees-statistiques/sur->  
25 [demande/donnees-msss/Pages/med-echo.aspx](http://www.ramq.gouv.qc.ca/fr/donnees-statistiques/sur-) (accessed 2015 Jun.  
26 2).  
27  
28 20. Thornhill S, Teasdale GM, Murray GD, et al. Disability  
29 in young people and adults after head injury: prospective  
30 cohort study. *BMJ* 2000;320:1631-1635.  
31  
32 21. Teasdale G, Jennett B. Assessment of coma and impaired  
33 consciousness. A practical scale. *Lancet* 1974;2:81-84.  
34  
35 22. Jennett B, Bond M. Assessment of outcome after severe  
36 brain damage. *Lancet* 1975;1:480-484.  
37  
38 23. Su, Y-S, Gelman A, et al. Multiple Imputation with  
39 Diagnostics (mi) in R: Opening Windows into the Black Box.  
40 *Journal of Statistical Software* 2011;45. Available:  
41  
42  
43  
44  
45  
46  
47  
48  
49  
50  
51  
52  
53  
54  
55  
56  
57  
58  
59  
60

1  
2  
3 <http://www.jstatsoft.org/v45/i02/paper> (accessed 22 Jul.  
4  
5 2014).

6  
7 24. Population et structure par âge et sexe. Québec (QC):  
8 Institut de la statistique du Québec; 2015. Available:  
9  
10 <http://www.stat.gouv.qc.ca/statistiques/population->  
11  
12 [demographie/structure/index.html](http://www.stat.gouv.qc.ca/statistiques/population-demographie/structure/index.html) (accessed 13 May 2015).  
13  
14

15 25. Projections et estimations de la population par  
16 territoire sociosanitaire. Québec (QC): Ministère de la  
17 Santé et Services Sociaux du Québec; 2015. Available :  
18  
19 <http://www.informa.msss.gouv.qc.ca/Listes.aspx?Name=y9M4IcKg>  
20  
21 [jFYapz02jKwkUg==&Key=hhKpcdsNkJS+eg2gWNwm7A==&OrderByClause=](http://www.informa.msss.gouv.qc.ca/Listes.aspx?Name=y9M4IcKg)  
22  
23 [8jnPckjxX8dPG+Ajs/DlA==&idDimension=PGShVhdHJuA=](http://www.informa.msss.gouv.qc.ca/Listes.aspx?Name=y9M4IcKg) (accessed  
24  
25 2015 May 23).  
26  
27

28  
29 26. Zou G. A Modified Poisson Regression Approach to  
30 Prospective Studies with Binary Data. *Am J Epidemiol*  
31  
32 2004;159:702-706.  
33  
34

35 27. Tri-Council Policy Statement: Ethical Conduct for  
36 Research Involving Humans. Ottawa (ON): Canadian Institutes  
37 of Health Research, Natural Sciences and Engineering  
38 Research Council of Canada, Social Sciences and Humanities  
39 Research Council of Canada; 2010. Available:  
40  
41 [http://www.pre.ethics.gc.ca/pdf/eng/tcps2/TCPS\\_2\\_FINAL\\_Web.p](http://www.pre.ethics.gc.ca/pdf/eng/tcps2/TCPS_2_FINAL_Web.pdf)  
42  
43 [df](http://www.pre.ethics.gc.ca/pdf/eng/tcps2/TCPS_2_FINAL_Web.pdf) (accessed 2015 Jun. 2)  
44  
45

46  
47 28. Roozenbeek B. Maas AIR, Menon DK. Changing patterns in  
48 the epidemiology of traumatic brain injury. *Nat RevNeurol*  
49  
50 2013;9:231-236.  
51  
52  
53  
54  
55  
56  
57  
58  
59  
60

- 1  
2  
3 29. Maas IR, Harrison-Felix CL, Menon D, et al.  
4  
5 Standardizing Data Collection in Traumatic Brain Injury. *J*  
6  
7 *Neurotrauma* 2011;28:177-187.  
8  
9 30. Koskinen S, Alaranta H. Traumatic brain injury in  
10  
11 Finland 1991-2005: A nationwide register of hospitalized and  
12  
13 fatal TBI. *BrainInj* 2008;22:205-214.  
14  
15 31. Shivaji T, Lee A, Dougall N, et al. The epidemiology of  
16  
17 hospital treated traumatic brain injury in Scotland. *BMC*  
18  
19 *Neurol* 2014;14:2.  
20  
21 32. Colantonio A, Croxford R, Farooq S, et al. Trends in  
22  
23 Hospitalization Associated with Traumatic Brain Injury in a  
24  
25 Publicly Insured Population, 1992-2002. *J Trauma*  
26  
27 2009;66:179-183.  
28  
29 33. Gabella B, Hoffman RE, Marine WW, et al. Urban and Rural  
30  
31 Traumatic Brain Injuries in Colorado. *Ann Epidemiol*  
32  
33 1997;7:207-212.  
34  
35 34. Laflamme L, Burrows S, Hasselberg M. Socioeconomic  
36  
37 differences in injury risks: A review of findings and a  
38  
39 discussion of potential countermeasures. Geneva: WHO; 2009.  
40  
41 Available: [http://www.euro.who.int/en/health-topics/disease-](http://www.euro.who.int/en/health-topics/disease-prevention/violence-and-injuries/publications/pre-2009/socioeconomic-differences-in-injury-risks.-a-review-of-findings-and-a-discussion-of-potential-countermeasures)  
42  
43 [pre-](http://www.euro.who.int/en/health-topics/disease-prevention/violence-and-injuries/publications/pre-2009/socioeconomic-differences-in-injury-risks.-a-review-of-findings-and-a-discussion-of-potential-countermeasures)  
44  
45 [pre-](http://www.euro.who.int/en/health-topics/disease-prevention/violence-and-injuries/publications/pre-2009/socioeconomic-differences-in-injury-risks.-a-review-of-findings-and-a-discussion-of-potential-countermeasures)  
46  
47 [2009/socioeconomic-differences-in-injury-risks.-a-review-of-](http://www.euro.who.int/en/health-topics/disease-prevention/violence-and-injuries/publications/pre-2009/socioeconomic-differences-in-injury-risks.-a-review-of-findings-and-a-discussion-of-potential-countermeasures)  
48  
49 [findings-and-a-discussion-of-potential-countermeasures](http://www.euro.who.int/en/health-topics/disease-prevention/violence-and-injuries/publications/pre-2009/socioeconomic-differences-in-injury-risks.-a-review-of-findings-and-a-discussion-of-potential-countermeasures)  
50  
51 (accessed 2015 Apr. 14).  
52  
53 35. Bowman SM, Aitken ME, Helmkamp JC, et al. Impact of  
54  
55 helmets on injuries to riders of all-terrain vehicles.  
56  
57 *InjPrev* 2009;15:3-7.  
58  
59  
60

1  
2  
3 36. Thompson DC, Rivara F, Thompson R. Helmets for  
4 preventing head and facial injuries in bicyclists. *Cochrane*  
5 *Database Syst Rev* 2000;CD001855.  
6  
7

8  
9 37. Thurman DJ, Alverson C, Dunn KA, et al. Traumatic Brain  
10 Injury in the United States: A Public Health Perspective.  
11 *Journal of Head Trauma Rehabil* 1999;14;602-615.  
12  
13

14 38. Cope DN. The effectiveness of traumatic brain injury  
15 rehabilitation: a review. *Brain Inj*1995;9:649-670.  
16  
17

18 39. Carroll LJ, Cassidy JD, Holm L, et al. Methodological  
19 issues and research recommendations for mild traumatic brain  
20 injury: the WHO Collaborating Centre Task Force on Mild  
21 Traumatic Brain Injury. *Journal of Rehabilitation Medicine*  
22 2004;(43 Suppl):113-25.  
23  
24  
25  
26  
27  
28  
29  
30  
31  
32  
33  
34  
35  
36  
37  
38  
39  
40  
41  
42  
43  
44  
45  
46  
47  
48  
49  
50  
51  
52  
53  
54  
55  
56  
57  
58  
59  
60

1  
2  
3 **Figure legends:**  
4  
5  
6

7 Figure 1:  
8  
9

10  
11 Title: Map of Québec with HRs-10, 17 and 18.  
12  
13

14  
15 Legend: Maps of Québec showing how the different HRs in the  
16 study are geographically related. HR-18 has 9 communities  
17 (arrows on Figure 1a) and is nested mainly within HR-10  
18 (Figure 1b). The northernmost community of HR-18 is nested  
19 with HR-17 (Figure 1c). These images were altered from the  
20 original images that were provided by Zorion on Wikimedia  
21 Commons. The alterations are in keeping with the Creative  
22 Commons Attribution-Share Alike 3.0 Unported license on  
23 Wikimedia Commons.[17]  
24  
25  
26  
27  
28  
29  
30  
31  
32  
33  
34  
35

36 Figure 2:  
37  
38  
39

40 Title: HR-18 yearly incidence rates compared to Québec and  
41 descriptive statistics on mechanisms of injury in the  
42 region.  
43  
44  
45

46  
47 Legend: Figure 2a shows HR-18 and Québec incidence rates  
48 were standardized to the 1991 population structure of  
49 Québec. Figures 2b and 2c demonstrate that mechanisms of  
50 injury varied by age group and geographical zone of HR-18,  
51 respectively.  
52  
53  
54  
55  
56  
57  
58  
59  
60



1  
2  
3  
4  
5  
6  
7  
8  
9  
10  
11  
12  
13  
14  
15  
16  
17  
18  
19  
20  
21  
22  
23  
24  
25  
26  
27  
28  
29  
30  
31  
32  
33  
34  
35  
36  
37  
38  
39  
40  
41  
42  
43  
44  
45  
46  
47  
48  
49  
50  
51  
52  
53  
54  
55  
56  
57  
58  
59  
60

Confidential

Table 1:

Title: ICD codes used to define TBI incident cases and external causes of injury using

ICD-9 and ICD-10 CA codes

| International Classification of Disease Iteration codes |                                                                                                                   |                                                                                                |
|---------------------------------------------------------|-------------------------------------------------------------------------------------------------------------------|------------------------------------------------------------------------------------------------|
| TBI diagnostic codes                                    | ICD-9                                                                                                             | ICD-10 CA                                                                                      |
| <i>Skull fractures</i>                                  | 800.0-801.9<br>803.0-804.9                                                                                        | S02.0-S02.1<br>S02.7<br>S02.89<br>S02.9                                                        |
| <i>Intracranial lesions</i>                             | 850.0-854.1                                                                                                       | S06.0-S06.9<br>T06.0                                                                           |
| External causes of Injury                               | ICD-9                                                                                                             | ICD-10 CA                                                                                      |
| <i>Motor vehicle traffic accident</i>                   | E810-E819 (.0, .1)                                                                                                | V30-V79 (.4-.9) V83-V85 (.0-.3)                                                                |
| <i>Motorcycle accident</i>                              | E810-E819 (.2, .3)                                                                                                | V20-V29 (.3-.9)                                                                                |
| <i>Snowmobile accident</i>                              | E820 (.0, .2, .3, .8, .9)                                                                                         | V86 (0.02)                                                                                     |
| <i>All-terrain vehicle accident (ATV)</i>               | E821 (.0, .2, .3, .8, .9)                                                                                         | V86 (0.03, 0.09)                                                                               |
| <i>Fall</i>                                             | E880-E882, E883 (.1-.9), E884 (.1-.9),<br>E885, E886.9, E887-E888                                                 | W00-W01, W03-W08, W10-W15,<br>W17-W19, X59.0                                                   |
| <i>Recreational/sports accident</i>                     | E828.2, E830-E831 (.4, .5), E842.6,<br>E883-E884 (.0), E886 (.0),<br>E902.2, E910 (.0, .1, .2), E917.0,<br>E927.9 | V80, V90-V94 (.5,.7,.8), V96, W02,<br>W09, W16, W21, W22 (.0-.7),<br>W51 (.0-.7), W67-W70, X50 |
| <i>Bicycle accident</i>                                 | E800-E809 (.3), E810-E819 (.6),<br>E820-E825 (.6), E826-E829 (.1),<br>E826.9                                      | V10-V19                                                                                        |
| <i>Pedestrian</i>                                       | E800-E809 (.2), E810-E819 (.7),<br>E820-E825 (.7), E826-E829 (.0)                                                 | V01-V09                                                                                        |
| <i>Assault</i>                                          | E960-E969                                                                                                         | X92-X99, Y00-Y09                                                                               |

Legend: Similarly to the INSPQ surveillance study, ICD 9 codes were used for case definitions between 2000 and 2005 and ICD-10 CA codes were used for case definitions

1  
2  
3 between 2006 and 2012.[16] This study additionally included cases that resulted from  
4  
5 assaults, which the INSPQ did not include.  
6  
7  
8  
9  
10  
11  
12  
13  
14  
15  
16  
17  
18  
19  
20  
21  
22  
23  
24  
25  
26  
27  
28  
29  
30  
31  
32  
33  
34  
35  
36  
37  
38  
39  
40  
41  
42  
43  
44  
45  
46  
47  
48  
49  
50  
51  
52  
53  
54  
55  
56  
57  
58  
59  
60

Confidential

Table 2:  
 Title: Summary statistics and incidence rates of TBI hospitalization by health region/province-wide (Part 2A) and by geographical zone of HR-18 (Part 2B)

| Summary statistics for HR-18 and referent populations (Part 2A)       |                    |        |                   |        |                   |                    |       |        |
|-----------------------------------------------------------------------|--------------------|--------|-------------------|--------|-------------------|--------------------|-------|--------|
|                                                                       | Region 18          |        | Region 17         |        | Region 10         | Province of Québec |       |        |
| <b>Total TBI hospitalizations</b>                                     | 172                |        | 469               |        | 154               | 50,362             |       |        |
| <b>Age</b>                                                            |                    |        |                   |        |                   |                    |       |        |
| Mean                                                                  | 24.63              |        | 23.42             |        | 35.32             | 45.93              |       |        |
| Range                                                                 | 0-80               |        | 0-86              |        | 0-98              | 0-106              |       |        |
| Standard deviation                                                    | 18.03              |        | 16.28             |        | 24.44             | 29.20              |       |        |
| <b>Sex (%)</b>                                                        |                    |        |                   |        |                   |                    |       |        |
| Male                                                                  | 113                | (65.7) | 255               | (54.4) | 100               | (64.9)             | 32041 | (57.1) |
| Female                                                                | 59                 | (34.3) | 214               | (45.6) | 54                | (35.1)             | 18321 | (42.9) |
| <b>Mechanism of injury (%)</b>                                        |                    |        |                   |        |                   |                    |       |        |
| Assault                                                               | 44                 | (25.6) | 76                | (16.2) | 8                 | (5.2)              | 1866  | (3.7)  |
| ATV                                                                   | 17                 | (9.9)  | 173               | (36.9) | 15                | (9.7)              | 1243  | (2.5)  |
| Snowmobile                                                            | 11                 | (6.4)  | 17                | (3.6)  | 2                 | (1.3)              | 150   | (0.3)  |
| Fall                                                                  | 38                 | (22.1) | 72                | (15.3) | 57                | (37.0)             | 24086 | (47.8) |
| MVC                                                                   | 36                 | (20.9) | 41                | (8.7)  | 31                | (20.1)             | 9129  | (18.1) |
| Bicycle                                                               | 7                  | (4.1)  | 9                 | (1.9)  | 8                 | (5.2)              | 2851  | (5.7)  |
| Pedestrian                                                            | 3                  | (1.7)  | 24                | (5.1)  | 4                 | (2.6)              | 2365  | (4.7)  |
| Motorcycle                                                            | 0                  | (0)    | 12                | (2.6)  | 0                 | (0)                | 841   | (1.7)  |
| Recreation/sports activity                                            | 6                  | (3.5)  | 2                 | (0.4)  | 1                 | (0.6)              | 326   | (0.6)  |
| Other                                                                 | 10                 | (5.8)  | 43                | (9.2)  | 28                | (18.1)             | 4202  | (8.3)  |
| Missing                                                               | 0                  | (0)    | 0                 | (0)    | 0                 | (0)                | 3303  | (6.6)  |
| <b>Total population person-years contributed</b>                      | 186,581            |        | 142,059           |        | 198,786           | 100,545,876        |       |        |
| <b>Crude incidence rate from 2000-2012 (per 100,000 person-years)</b> | 92.10              |        | 330.15            |        | 77.47             | 50.09              |       |        |
| <b>NB regression IRR (95% CI)</b>                                     | 1.84 (1.56 , 2.17) |        | 6.82 (6.06,7.65)  |        | 1.55 (1.30,1.83)  | 1.00 (Referent)    |       |        |
| HR-18 analysis by geographical zone (Part 2B)                         |                    |        |                   |        |                   |                    |       |        |
| Zone                                                                  | Inland             |        | Coastal           |        | Remote            |                    |       |        |
| <b>Crude incidence rate from 2000-2012 (per 100,000 person-years)</b> | 72.04              |        | 95.48             |        | 200.00            |                    |       |        |
| <b>NB regression IRR (95% CI)</b>                                     | 1.00 (Referent)    |        | 1.32 (0.96 ,1.82) |        | 2.73 (1.64, 4.27) |                    |       |        |

1  
2  
3 Legend: Missing data were only present for province-wide data on mechanisms of injury  
4 and only represented a small proportion (6.6%). As such, for all subsequent regression  
5  
6 models, a listwise deletion (complete case) analysis was used. The two negative  
7  
8 binomial regression models shown were adjusted for age, sex and year of injury. NB =  
9  
10 negative binomial, IRR = incidence rate ratio, CI = confidence interval.  
11  
12  
13  
14  
15  
16  
17  
18  
19  
20  
21  
22  
23  
24  
25  
26  
27  
28  
29  
30  
31  
32  
33  
34  
35  
36  
37  
38  
39  
40  
41  
42  
43  
44  
45  
46  
47  
48  
49  
50  
51  
52  
53  
54  
55  
56  
57  
58  
59  
60

Confidential

Table 3:

Title: Summary of regression models used in the study's secondary analysis to assess associations between TBI risk factors/determinants and injury severity, functional outcome, and use of rehabilitation.

| <b>Outcome - contrast/(regression type)</b>                                | <b>Effect measure</b> | <b>95% CI</b> | <b>Interpretation</b>                                                             |
|----------------------------------------------------------------------------|-----------------------|---------------|-----------------------------------------------------------------------------------|
| <b>GCS - remote versus inland geographical zone/(Linear)</b>               | Beta = -2.76          | -4.67 , -0.84 | <i>Living in a remote community predicted more severe TBI (lower initial GCS)</i> |
| <b>GCS –protective equipment use/(Linear)</b>                              | Beta =1.29            | -0.27 , 2.85  | <i>Use of protective equipment predicted less severe TBI</i>                      |
| <b>GOS –protective equipment use/(Proportional odds)</b>                   | OR = 0.17             | 0.03 , 0.85   | <i>Use of protective equipment predicted better outcomes on GOS</i>               |
| <b>GOS - initial GCS/(Proportional odds)</b>                               | OR = 0.57             | 0.44 , 0.74   | <i>Higher initial GCS predicted better outcomes on GOS</i>                        |
| <b>Rehabilitation use - initial GCS/(Poisson with robust variance)</b>     | RR = 0.86             | 0.78 , 0.96   | <i>Lower initial GCS predicted use of rehabilitation services</i>                 |
| <b>Rehabilitation use - MVC versus fall (Poisson with robust variance)</b> | RR =3.79              | 1.53 , 9.33   | <i>Being involved in an MVC predicted use of rehabilitation services</i>          |

Legend: Depending on the model selection results (see Supplementary Methods s3), the following covariates were included in the models: age, sex, initial GCS, six month GOS, comorbidities, geographic zone, rehabilitation use, protective equipment use, polytrauma status and alcohol intoxication status. Online Supplementary Figures s9a-s9f show the complete regression outputs for each of these regression models. Supplementary Methods

1  
2  
3 s3 describes the assumptions that were made when using each of these models. RR =  
4  
5  
6 Risk ratio. OR = Odds ratio. CI = Confidence interval.  
7  
8  
9  
10  
11  
12  
13  
14  
15  
16  
17  
18  
19  
20  
21  
22  
23  
24  
25  
26  
27  
28  
29  
30  
31  
32  
33  
34  
35  
36  
37  
38  
39  
40  
41  
42  
43  
44  
45  
46  
47  
48  
49  
50  
51  
52  
53  
54  
55  
56  
57  
58  
59  
60

Confidential

1  
2  
3  
4  
5  
6  
7  
8  
9  
10  
11  
12  
13  
14  
15  
16  
17  
18  
19  
20  
21  
22  
23  
24  
25  
26  
27  
28  
29  
30  
31  
32  
33  
34  
35  
36  
37  
38  
39  
40  
41  
42  
43  
44  
45  
46  
47  
48  
49  
50  
51  
52  
53  
54  
55  
56  
57  
58  
59  
60

# Supplementary File

Figure s1: Map of Eeyou Istchee's (HR 18) health network and road access

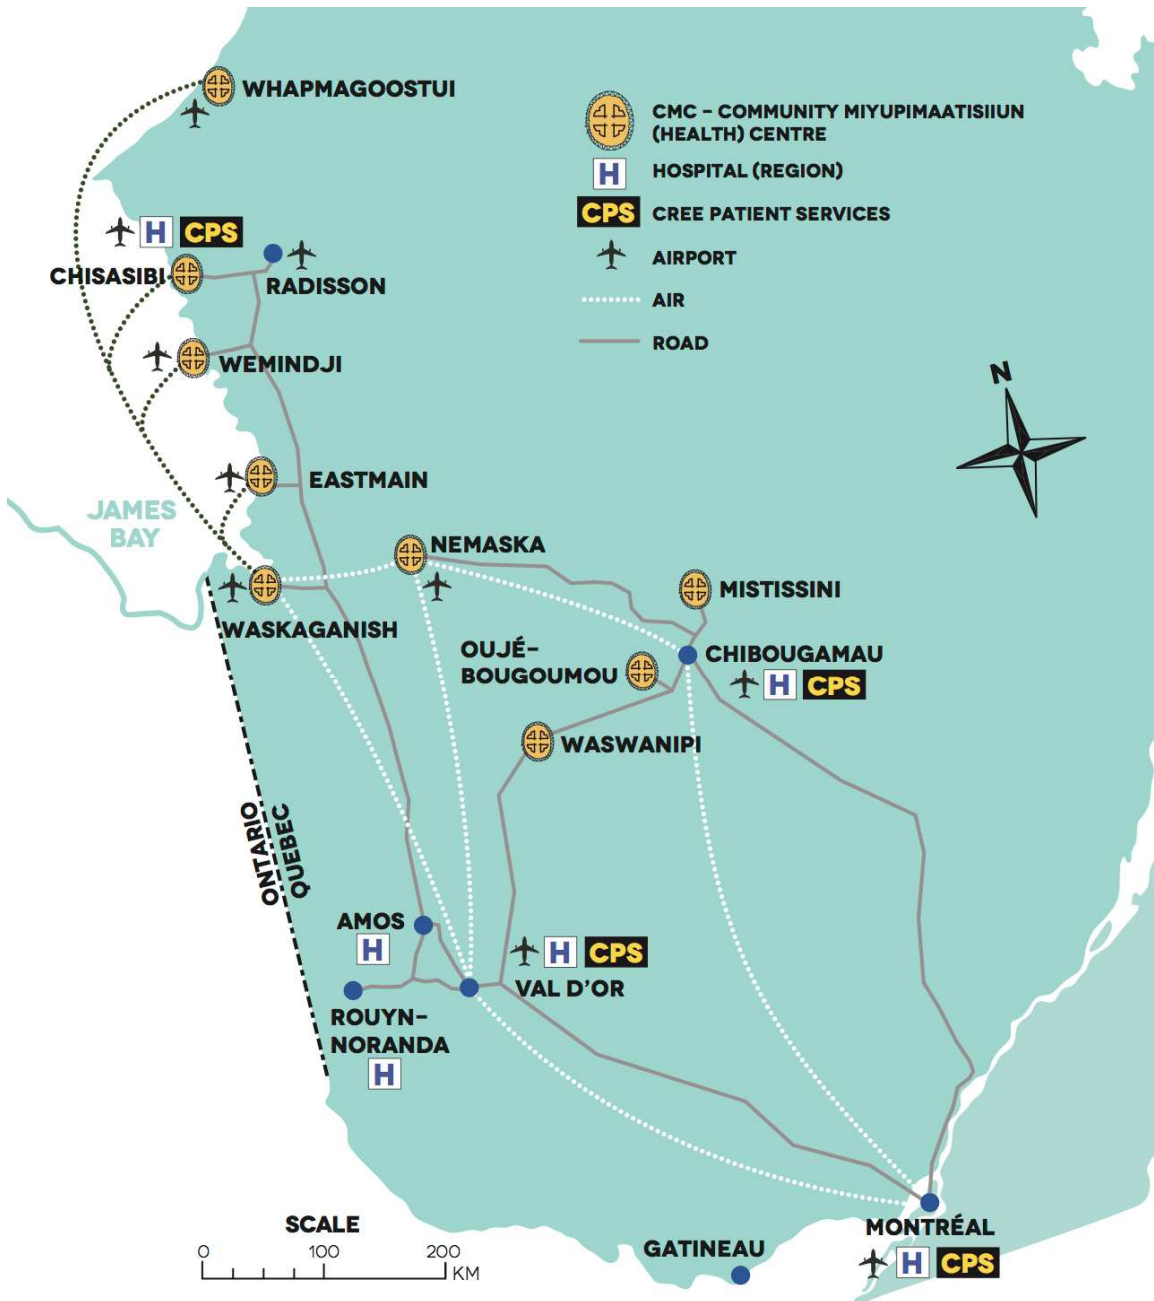

Each of the 9 communities in Eeyou Istchee have a local medical clinic (CMC) except for 1 community where there is a hospital. Four communities are considered inland and four



1  
2  
3 other communities bordering the James Bay are considered coastal. These last  
4 communities all have access to the provincial road network. A single northernmost  
5 community bordered by the Hudson Bay is considered remote, where there is no access  
6 to the provincial road network. For the secondary analysis chart review, all local clinic  
7 charts were audited for identified cases as well as the charts at the secondary and tertiary  
8 trauma hospitals that are part of the HR 18 health network. Reproduced with permission  
9 for the CBHSSJB (Cree Board of Health and Social Services of James Bay. 2014.  
10 <http://www.creehealth.org/communities>. Accessed April 22, 2015).  
11  
12  
13  
14  
15  
16  
17  
18  
19  
20  
21  
22  
23  
24  
25  
26  
27  
28  
29  
30  
31  
32  
33  
34  
35  
36  
37  
38  
39  
40  
41  
42  
43  
44  
45  
46  
47  
48  
49  
50  
51  
52  
53  
54  
55  
56  
57  
58  
59  
60

Confidential

Figure s2: Flow-chart of data ascertainment for the primary and secondary analyses.

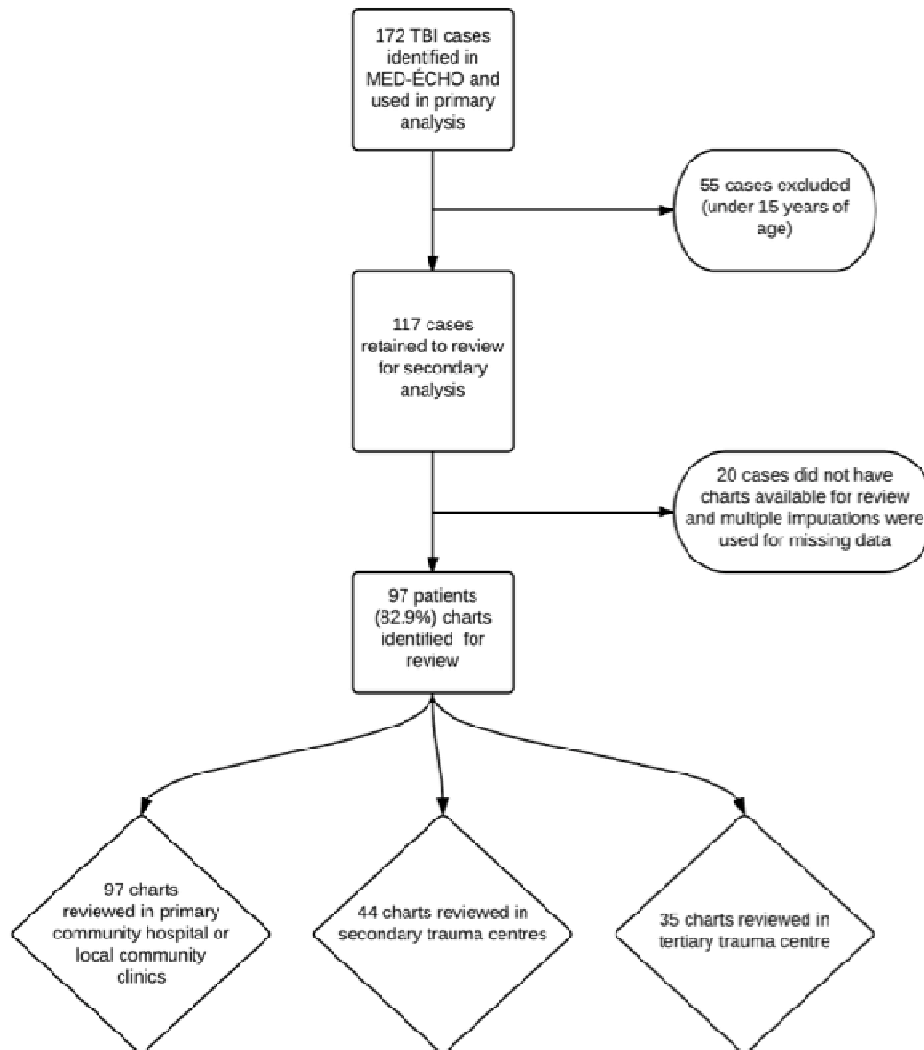

For the primary analysis the MED-ÉCHO administrative database was used for case finding based on the definitions provided. For the secondary analysis, charts were reviewed at local community clinics. If patients were transferred numerous times between institutions (shown on Figure s1), up to three different charts of a single patient were reviewed.

### Supplementary Methods s3:

#### *Measured variables:*

All-terrain vehicles (ATVs) and snowmobiles were grouped together in the analysis as “off-road vehicle” collisions. The additional variables ascertained through the chart review were used to address the secondary objectives of the study. These variables included the earliest initial post-resuscitation Glasgow Coma Score (GCS), specific use of protective material (seatbelt or helmet), polytrauma status (defined as any patient with a traumatic injury to another body region in addition to the head), comorbidity status (including any patient with 2 or more of diabetes mellitus, dyslipidemia, hypertension, coronary artery disease, history of stroke or psychiatric illness) and intoxication status with alcohol as reported by the chart note of the first physician assessment. The severity of injury was classified as “mild”, “moderate” or “severe” based on the earliest recorded post-resuscitation GCS (GCS of 13-15, 9-12, 3-8, respectively).[21] Functional outcomes were assessed with the first Glasgow Outcome Scores (GOS) of patients at least 6 months after the injury, as noted in the patient's chart by their family physician at their local CMC or by a rehabilitation physician who would have sent their assessment for inclusion in the patient’s chart.[22] A score of 1 was death, 2 was a vegetative state, 3 was permanent disability requiring help with daily living, 4 was moderate disability where special assistance may be need for specific tasks, and a score of 5 was a functional recovery with low disability. If a GOS score was not explicitly recorded, the chart extractor interpreted the clinical notes (by physicians or nurses following-up with the patients) 6 months after the injury to assign a GOS. Lastly, charts were reviewed to ascertain whether or not patients had used inpatient or outpatient rehabilitation services for their injury.

Region 18 communities were stratified based on their geography as either “coastal (semi-remote)”, “inland” (rural and semi-remote) or “remote” as these communities have similar built environments (i.e.: coastal communities are on the James Bay coast and have distant access to the provincial network of roadways, inland communities are significantly closer to the provincial network of roadways and are not on the James Bay coast, and the remote community has local roadways that are not connected to provincial roadways or other communities) (Figure s1 above).

#### *Missing data:*

Diagnostic plots included in the package were used to verify the validity of the imputed data. All regression models used in the secondary analysis used pooled estimates of the imputed datasets. These data were assumed to be missing at random.

#### *Statistical analysis:*

Mechanisms of injury were compared between HR 18 and the reference populations using a multinomial regression model. In addition, comparisons between

1  
2  
3 mechanisms of injury within HR 18 were contrasted by the geographical zones of the  
4 communities to identify whether the built/natural environment had an association with  
5 the mechanism of injury. For this last analysis, two Poisson regression models that used a  
6 robust variance to estimate the risk ratio (RR) were use to contrast the risk of incurring a  
7 TBI with a specific mechanism compared to all other mechanisms by geographical zone.  
8 The methodology behind this approach has been previously described.[26]  
9  
10

11 For the secondary objectives of the study, which were to describe the severity,  
12 risk factors, functional outcomes, and use of health care resources amongst adults  
13 affected by TBI in Eeyou Istchee, descriptive statistics on the risk factors of TBI  
14 hospitalization in adults were produced using only complete data. Moreover, different  
15 regression models subsequently described were used to compute association measures of  
16 various risk factors related to TBI on injury severity, functional outcome, use of  
17 rehabilitation and alcohol intoxication. Linear regression models were used to assess the  
18 association between the use of protective equipment/geographical zone and injury  
19 severity (GCS). Each linear model used met the assumptions used for linear regression  
20 (normality of residuals, a linear relationship between the dependent and independent  
21 variables and homoscedasticity). Cumulative odds logistic regression models were used  
22 to assess the association of protective equipment/injury severity on functional outcome at  
23 6 months (using the GOS). If the proportional odds assumption was met, a proportional  
24 odds logistic regression was used. Poisson regression models were used (instead of  
25 logistic regression models since the outcomes were common) to assess the association  
26 between mechanism of injury and the and the use of rehabilitation services or alcohol  
27 intoxication at the time of injury.[26] These associations were set out at the start of the  
28 study to establish whether injury severity, outcome and use of rehabilitation services  
29 were affected by/associated to modifiable risk factors in HR-18. Regression models were  
30 selected based on a forward-backward iterative process using the Akaike Information  
31 Criterion statistic to select the most parsimonious model along with traditional directed  
32 acyclic graphs to ensure that only known confounders of the associations being  
33 investigated were included in the models.  
34  
35  
36  
37  
38  
39  
40

### 41 *Sensitivity analysis*

42

43 Given that the study was conducted in rural to remote populations there was the  
44 possibility that more hospitalizations may have occurred for milder injuries compared to  
45 an urban centre where hospital beds are proportionately more limited for the larger  
46 population it serves. Thus, a sensitivity analysis was completed by measuring the  
47 proportion of mild, moderate, and severe TBI hospitalizations in the urban population of  
48 Montréal (HR-6) (indicated on Figure 2 as “Montréal”) at a level 1 trauma centre and  
49 comparing it to HR-18. The TBI database of the trauma centre that admits these patients  
50 was used to identify all the moderate and severe TBI patients admitted from their  
51 specifically defined catchment area. This database records all TBI hospitalizations along  
52 with many variables including the initial post-resuscitation GCS. Obligatorily, moderate  
53 and severe TBI patients are admitted to this specialized centre, whereas most other mild  
54 TBI cases that occur in HR-6 are managed in non-specialized trauma centres of the  
55  
56  
57  
58  
59  
60

1  
2  
3 region. Using the MED-ÉCHO database, all TBI cases in Montréal's HR were identified  
4 that are a part of this trauma centre's catchment area. With this last denominator, the  
5 proportions of different severity TBI in this urban population were computed and  
6 compared to those of HR 18. A Chi-Square test for independence with a significance  
7 level of 5% was used to establish whether or not there was a difference in the distribution  
8 of TBI severity in the urban versus rural settings.  
9  
10  
11  
12  
13  
14  
15  
16  
17  
18  
19  
20  
21  
22  
23  
24  
25  
26  
27  
28  
29  
30  
31  
32  
33  
34  
35  
36  
37  
38  
39  
40  
41  
42  
43  
44  
45  
46  
47  
48  
49  
50  
51  
52  
53  
54  
55  
56  
57  
58  
59  
60

Confidential

**Supplementary Table s4:** Associations between mechanism of injury leading to TBI hospitalization and HRs using multinomial regression

| <b>Region and mechanism of injury</b> | <b>Relative probability ratio</b> | <b>95% confidence interval</b> |
|---------------------------------------|-----------------------------------|--------------------------------|
| <b>HR-10</b>                          |                                   |                                |
| Assault                               | 1.47                              | 0.69 , 3.11                    |
| ATV                                   | 4.11                              | 2.28 , 7.38                    |
| Snowmobile                            | 4.66                              | 1.12 , 19.37                   |
| <b>HR-17</b>                          |                                   |                                |
| Assault                               | 11.77                             | 8.40 , 16.48                   |
| ATV                                   | 38.06                             | 28.40 , 51.00                  |
| Snowmobile                            | 32.77                             | 18.59 , 57.78                  |
| <b>HR-18</b>                          |                                   |                                |
| Assault                               | 10.69                             | 6.81 , 16.80                   |
| ATV                                   | 6.06                              | 3.38 , 10.87                   |
| Snowmobile                            | 34.20                             | 16.97 , 68.94                  |

The referent population is the entire province of Québec and the referent mechanism of injury is falls. The model was adjusted for age, sex and year of injury. The rest of the output is available below.

| Coefficient           | Odds ratio | 95% confidence interval |
|-----------------------|------------|-------------------------|
| Intercept: Assault    | 0.08       | 0.07 - 0.09             |
| Intercept :ATV        | 0.07       | 0.06-0.08               |
| Intercept : Bicycle   | 0.25       | 0.23-0.27               |
| Intercept :Motorcycle | 0.04       | 0.03-0.05               |
| Intercept :MVC        | 0.84       | 0.79-0.89               |
| Intercept :Other      | 0.35       | 0.32-0.37               |
| Intercept :Pedestrian | 0.21       | 0.19-0.23               |
| Intercept :Recreation | 0.05       | 0.04-0.07               |
| Intercept :Ski        | 0.01       | 0.00-0.01               |
| age: Assault          | 0.98       | 0.97-0.98               |
| age:ATV               | 0.97       | 0.97-0.98               |
| age : Bicycle         | 0.97       | 0.97-0.97               |
| age :Motorcycle       | 0.98       | 0.98-0.99               |
| age :MVC              | 0.98       | 0.98-0.98               |
| age :Other            | 0.97       | 0.97-0.98               |
| age :Pedestrian       | 0.99       | 0.99-0.99               |
| age :Recreation       | 0.98       | 0.97-0.98               |
| age :Ski              | 0.98       | 0.97-0.98               |
| regionqc10: Assault   | 1.47       | 0.69-3.11               |
| regionqc10:ATV        | 4.11       | 2.28-7.38               |
| regionqc10: Bicycle   | 0.93       | 0.44-1.97               |
| regionqc10:Motorcycle | 0.00       | 0.00-Infinity           |
| regionqc10:MVC        | 1.18       | 0.75-1.84               |
| regionqc10:Other      | 1.45       | 0.84-2.50               |
| regionqc10:Pedestrian | 0.62       | 0.22-1.71               |
| regionqc10:Recreation | 1.03       | 0.14-7.50               |
| regionqc10:Ski        | 4.66       | 1.12-19.37              |
| region17: Assault     | 11.77      | 8.40-16.48              |
| region17:ATV          | 38.06      | 28.40-51.00             |

|                     |       |             |
|---------------------|-------|-------------|
| region17: Bicycle   | 0.75  | 0.38-1.51   |
| region17:Motorcycle | 4.23  | 2.28-7.87   |
| region17:MVC        | 1.06  | 0.72-1.56   |
| region17:Other      | 1.40  | 0.88-2.23   |
| region17:Pedestrian | 2.40  | 1.51-3.83   |
| region17:Recreation | 1.13  | 0.27-4.63   |
| region17:Ski        | 32.77 | 18.59-57.78 |
| region18: Assault   | 10.69 | 6.81-16.80  |
| region18:ATV        | 6.06  | 3.38-10.87  |
| region18: Bicycle   | 1.00  | 0.44-2.25   |
| region18:Motorcycle | 0.00  | 0-Infinity  |
| region18:MVC        | 1.71  | 1.08-2.72   |
| region18:Other      | 0.71  | 0.32-1.60   |
| region18:Pedestrian | 0.60  | 0.18-1.94   |
| region18:Recreation | 5.88  | 2.29-15.13  |
| region18:Ski        | 34.20 | 16.97-68.94 |
| Sexmale: Assault    | 3.95  | 3.47-4.49   |
| Sexmale :ATV        | 3.09  | 2.69-3.56   |
| Sexmale : Bicycle   | 2.18  | 1.99-2.39   |
| Sexmale :Motorcycle | 2.69  | 2.27-3.19   |
| Sexmale :MVC        | 1.28  | 1.21-1.35   |
| Sexmale :Other      | 1.86  | 1.72-2.00   |
| Sexmale :Pedestrian | 0.79  | 0.73-0.86   |
| Sexmale :Recreation | 0.57  | 0.46-0.71   |
| Sexmale :Ski        | 3.12  | 2.14-4.54   |



**Supplementary Table s5:** Association between mechanisms of injury by geographical zone in HR-18 using Poisson regression with robust variance estimation.

| Population                                    | Risk ratio | 95% confidence interval |
|-----------------------------------------------|------------|-------------------------|
| <b>Off-road vehicles vs. other mechanisms</b> |            |                         |
| Inland                                        | 1          | Referent                |
| Coastal                                       | 1.40       | 0.36 , 6.14             |
| Remote                                        | 100.39     | 20.28 , 734.39          |
| <b>Assaults vs. other mechanisms</b>          |            |                         |
| Inland                                        | 1          | Referent                |
| Coastal                                       | 0.73       | 0.30 , 1.72             |
| Remote                                        | 0.20       | 0.03 , 0.92             |

Risk ratios were estimated using two Poisson regression models that adjusted for age, sex and year of injury. The methodology behind using the Poisson regression to estimate risk ratios in cohort studies is shown elsewhere.[26]

**Supplementary Table s6:** Summary statistics for the sub-analysis of adults (15 years or older) in HR-18 hospitalized for TBI.

|                                                                               |       |         |
|-------------------------------------------------------------------------------|-------|---------|
| <b>Total TBI hospitalizations</b>                                             | 117   |         |
| <b>Initial post-resuscitation GCS</b>                                         |       |         |
| Mean                                                                          | 13.74 |         |
| Range                                                                         | 3-15  |         |
| Standard deviation                                                            | 2.33  |         |
| <i>TBI severity category (GCS range) (%)</i>                                  |       |         |
| Mild (13-15)                                                                  | 81    | (83.5)  |
| Moderate (9-12)                                                               | 7     | (7.2)   |
| Severe (3-8)                                                                  | 9     | (9.2)   |
| <b>Polytrauma (%)</b>                                                         |       |         |
| Yes                                                                           | 43    | (44.3)  |
| No                                                                            | 54    | (55.7)  |
| <b>Rehabilitation (%)</b>                                                     |       |         |
| Inpatient                                                                     | 12    | (12.4)  |
| Outpatient (in community)                                                     | 22    | (22.6)  |
| <b>Discharge orientation (%)</b>                                              |       |         |
| Home                                                                          | 83    | (85.6)  |
| Rehabilitation (inpatient)                                                    | 12    | (12.4)  |
| Deceased                                                                      | 0     | (1.0)   |
| Long-term care                                                                | 0     | (0.0)   |
| Other hospital centre                                                         | 2     | (2.0)   |
| <b>Outcome (GOS) (%)</b>                                                      |       |         |
| 1                                                                             | 0     | (0)     |
| 2                                                                             | 0     | (0)     |
| 3                                                                             | 14    | (14.4)  |
| 4                                                                             | 52    | (53.6)  |
| 5                                                                             | 31    | (32.0)  |
| Number of scores assigned by data extractor from interpretation of chart      | 45    | (46.3%) |
| <b>Protection (for MVC, off-road vehicle collision or bicycle injury) (%)</b> |       |         |
| Yes                                                                           | 11    | (26.8)  |
| No                                                                            | 30    | (73.2)  |
| <b>Intoxication with alcohol (%)</b>                                          |       |         |
| Yes                                                                           | 43    | (44.3)  |
| No                                                                            | 54    | (55.7)  |
| <b>Missing data (%)</b>                                                       | 20    | (17.1%) |

A total of 20 cases (17.1%) had missing data for 1 or more variables (and are not included in the table). Multiple imputation using chained equations was used for these missing data and all regression analyses used the pooled data from the imputation.

1  
2  
3  
4  
5  
6  
7  
8  
9  
10  
11  
12  
13  
14  
15  
16  
17  
18  
19  
20  
21  
22  
23  
24  
25  
26  
27  
28  
29  
30  
31  
32  
33  
34  
35  
36  
37  
38  
39  
40  
41  
42  
43  
44  
45  
46  
47  
48  
49  
50  
51  
52  
53  
54  
55  
56  
57  
58  
59  
60

**Supplementary Figure s7:** Proportion of adults (sub-analysis) wearing protective equipment at the time of their TBI hospitalization in HR 18.

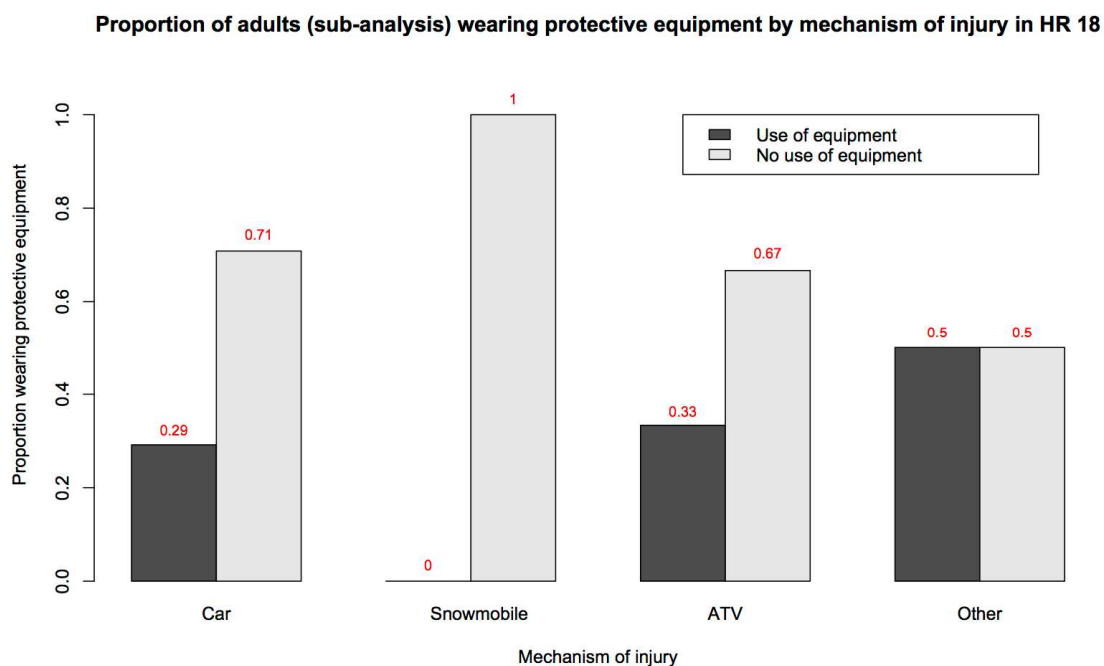

Patient involved in a recreational accident (sports/cycling) were the most likely to wear protective equipment. Most patients involved in MVCs (car) and ATV collisions did not wear protective equipment (seatbelts and helmets, respectively). No patients involved in snowmobile accidents wore a helmet.

Confidential

1  
2  
3  
4  
5  
6  
7  
8  
9  
10  
11  
12  
13  
14  
15  
16  
17  
18  
19  
20  
21  
22  
23  
24  
25  
26  
27  
28  
29  
30  
31  
32  
33  
34  
35  
36  
37  
38  
39  
40  
41  
42  
43  
44  
45  
46  
47  
48  
49  
50  
51  
52  
53  
54  
55  
56  
57  
58  
59  
60

**Supplementary Figure s8:** Proportion of adults (sub-analysis) receiving rehabilitation by mechanism of injury in HR 18.

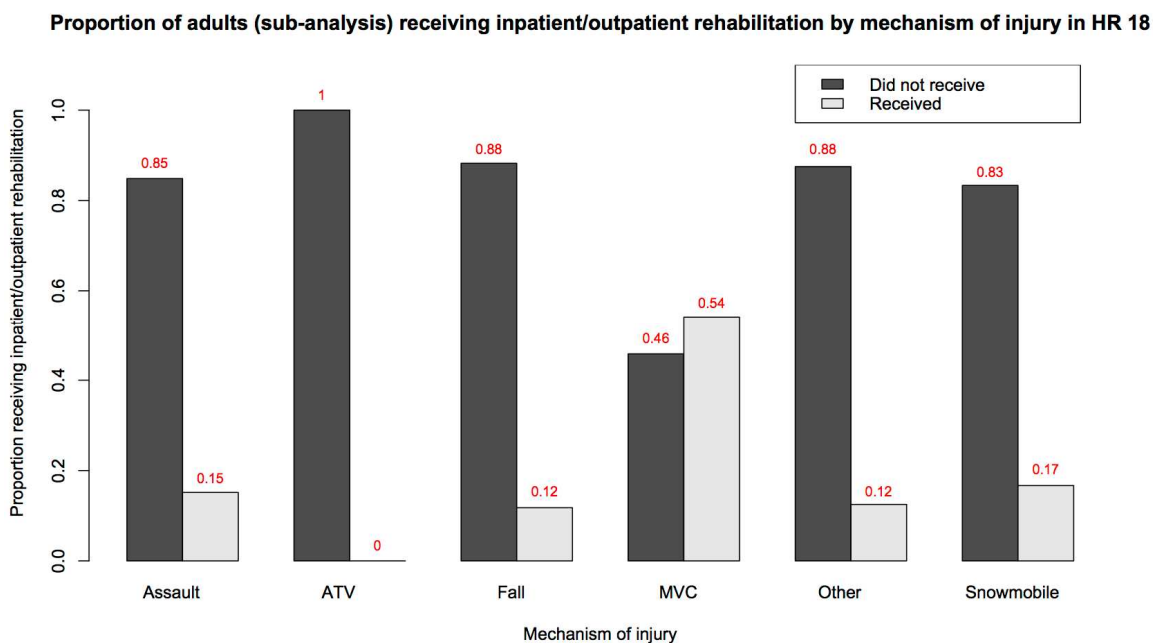

Adult patients that were involved in MVCs were more likely to receive rehabilitation than all other mechanisms of injury.

**Supplementary Figure s9:** Full regression model outputs from sub-analysis of HR 18 adults.

Table s9a

Linear regression model output measuring the association between geographical zones and GCS in adults.

| Variables                 | Coefficient | 95% confidence interval |
|---------------------------|-------------|-------------------------|
| Intercept                 | 14.12       | 12.32 , 15.93           |
| Age(25-44)                | 0.51        | -0.55 , 1.57            |
| Age(45-64)                | 0.19        | -1.25 , 1.64            |
| Age(>65)                  | -0.58       | -3.62 , 2.46            |
| Sex: Male                 | -0.55       | -1.60 , 0.50            |
| Community:Coastal         | 0.01        | -1.01 , 1.04            |
| Community:Remote          | -2.76       | -4.67 , -0.84           |
| Alcohol intoxication: Yes | -1.18       | -2.17 , -0.19           |
| Mechanism: Assault        | 0.65        | -0.85 , 2.15            |
| Mechanism: Off-road       | 1.65        | -0.34 , 3.66            |
| Mechanism: Other          | 0.46        | -1.58 , 2.50            |
| Mechanism: MVC            | 0.78        | -0.77 , 2.33            |

Output for linear regression model assessing the association between geographical zones and initial injury severity (GCS) and adjusted for all the covariates listed. The referent for age was the 15-24 age group and for mechanism of injury was falls.

Table s9b

Linear regression model output measuring the association between protective equipment use and GCS in adults.

| Variables       | Coefficient | 95% confidence interval |
|-----------------|-------------|-------------------------|
| Intercept       | 13.27       | 11.53 , 15.01           |
| Age(25-44)      | 0.42        | -1.05 , 1.88            |
| Age(45-64)      | 0.39        | -1.90 , 2.68            |
| Sex: Male       | 0.18        | -1.14 , 1.51            |
| Protection: Yes | 1.29        | -0.27 , 2.85            |
| Alcohol: Yes    | -0.47       | -1.87 , 0.93            |
| Mechanism: MVC  | 0.49        | -0.91 , 1.88            |

Output for linear regression model assessing the association of protective equipment with initial injury severity (GCS) and adjusted for the covariates listed. This model was only used on patients that had a mechanism of injury where protective equipment could be used (e.g.: off-road vehicles and MVCs). There were no patients that were 65 years or older or that had another mechanism of injury where protection could be worn. The referent group for age is 15-24 years and is off-road vehicles (ATVs and snowmobiles) for the mechanism of injury variable.

Table s9c

Proportional odds logistic regression model output measuring the association between protective equipment use and GOS 6 months after injury in adults.

| Variables        | Odds ratio | 95% confidence interval |
|------------------|------------|-------------------------|
| Intercept 1      | 0.32       | 0.05 , 1.97             |
| Intercept 2      | 11.34      | 1.57 , 81.96            |
| Age(25-44)       | 1.67       | 0.35 , 7.99             |
| Age(45-64)       | 12.27      | 0.73 , 207.68           |
| Sex: Male        | 0.52       | 0.13 , 2.04             |
| Comorbidity: Yes | 1.05       | 0.14 , 7.72             |
| Alcohol: Yes     | 0.61       | 0.15 , 2.52             |
| Mechanism: MVC   | 0.30       | 0.07 , 1.36             |
| Polytrauma: Yes  | 1.06       | 0.21 , 5.25             |
| Protection: Yes  | 0.17       | 0.03 , 0.85             |

Output for proportional odds logistic regression measuring the association between protective equipment use and functional outcome at 6 months as measured on the GOS and adjusted for all of the listed covariates. This model was only used on patients that had a mechanism of injury where protective equipment could be used (e.g.: off-road vehicles and MVCs). There were no patients that were 65 years or older or that had another mechanism of injury where protection could be used. The proportional odds model was used since the proportionality assumption was met after running a cumulative odds logistic model. The referent group for age is 15-24 years and is off-road vehicles (ATVs and snowmobiles) for the mechanism of injury variable.

Table s9d

Proportional odds logistic regression model measuring the association between initial GCS and GOS 6 months after injury in adults.

| Variables                 | Odds ratio | 95% confidence interval |
|---------------------------|------------|-------------------------|
| Intercept 1               | 109.27     | 2.06 , 2527.18          |
| Intercept 2               | 4542.15    | 59.40 , 151291.23       |
| Age(25-44)                | 2.84       | 1.05 , 7.66             |
| Age(45-64)                | 12.47      | 2.38 , 65.26            |
| Age(>65)                  | 99.57      | 2.98 , 3324.69          |
| Sex: Male                 | 0.37       | 0.13 , 1.04             |
| Comorbidity: Yes          | 1.00       | 0.24 , 4.09             |
| Alcohol intoxication: Yes | 1.10       | 0.44 , 2.76             |
| Mechanism: Assault        | 0.66       | 0.16 , 2.76             |
| Mechanism: Off-road       | 2.19       | 0.42 , 11.38            |
| Mechanism: Other          | 0.92       | 0.14 , 5.90             |
| Mechanism: MVC            | 0.74       | 0.16 , 3.48             |
| Polytrauma: Yes           | 1.47       | 0.55 , 3.93             |
| GCS                       | 0.57       | 0.44 , 0.74             |

Output for proportional odds logistic regression measuring the association between initial GCS and functional outcome at 6 months as measured on the GOS and adjusted for all of the listed covariates. The proportional odds model was used since the proportionality assumption was met after running a cumulative odds logistic model. The referent group for age is 15-24 years and is falls for the mechanism of injury variable.



Table s9e

Poisson regression model measuring the association between mechanism of injury and the use of rehabilitation services in adults.

| Variables           | Risk ratio | 95% confidence interval |
|---------------------|------------|-------------------------|
| Age(25-44)          | 1.75       | 0.82 , 3.74             |
| Age(45-64)          | 2.55       | 1.07 , 6.02             |
| Age(65+)            | 2.44       | 0.38 , 15.55            |
| Sex: Male           | 0.93       | 0.53 , 1.62             |
| GCS                 | 0.86       | 0.78 , 0.96             |
| Comorbidity: Yes    | 1.18       | 0.65 , 2.17             |
| Community: Coastal  | 0.74       | 0.40 , 1.34             |
| Community: Remote   | 0.56       | 0.15 , 2.11             |
| Mechanism: Assault  | 1.06       | 0.33 , 3.38             |
| Mechanism: Off-road | 1.69       | 0.38 , 7.54             |
| Mechanism: Other    | 2.49       | 0.89 , 7.02             |
| Mechanism: MVC      | 3.79       | 1.53 , 9.33             |

Output for Poisson regression model to estimate the association between TBI patients' mechanism of injury and their probability of receiving rehabilitation services. A robust variance estimator was used to estimate a risk ratio since the outcome was common.[26] The referent group for the age group is 15-24 years of age and for mechanism of injury is falls.

Table s9f

Poisson regression model measuring the association between mechanism of injury and alcohol intoxication at the time of injury in adults.

| Variables           | Risk ratio | 95% confidence interval |
|---------------------|------------|-------------------------|
| Age(25-44)          | 0.92       | 0.66 , 1.30             |
| Age(45-64)          | 0.52       | 0.23 , 1.11             |
| Sex: Male           | 0.91       | 0.64 , 1.28             |
| Community:Coastal   | 1.03       | 0.73 , 1.44             |
| Community:Remote    | 0.63       | 0.27 , 1.49             |
| Mechanism: Assault  | 1.70       | 0.80 , 3.59             |
| Mechanism: Off-road | 1.74       | 0.76 , 3.99             |
| Mechanism: Other    | 1.21       | 0.46 , 3.19             |
| Mechanism: MVC      | 1.46       | 0.67 , 3.13             |

Output for Poisson regression model to estimate the association between TBI patients' mechanism of injury and being intoxicated with alcohol at the time of injury. A robust variance estimator was used to estimate a risk ratio since the outcome was common.[26] The referent group for the age group is 15-24 years of age and for mechanism of injury is falls. No patients 65 years or older were intoxicated at the time of injury.

**Supplementary Table s10:** Comparison of the distribution of TBI severities amongst hospitalized patients in rural HR 18 and HR 6 (Montréal).

| Population                                | TBI hospitalization by severity (%) |                 |               |
|-------------------------------------------|-------------------------------------|-----------------|---------------|
|                                           | <i>Mild</i>                         | <i>Moderate</i> | <i>Severe</i> |
| <b>HR 6 (urban)</b>                       | 5467 (83.6)                         | 388 (5.9)       | 681 (10.4)    |
| <b>HR 18 (rural)</b>                      | 81 (83.5)                           | 7 (7.2)         | 9 (9.2)       |
| $\chi^2 = 0.3828$<br>df=2<br>$p = 0.8258$ |                                     |                 |               |

This sensitivity analysis was completed to investigate whether or not the incidence rates calculated for HR-18 were biased because of different hospitalization practices in the rural setting compared to the urban setting. These proportions are for the time-period from 2000-2012.

1  
2  
3  
4  
5  
6  
7  
8  
9  
10  
11  
12  
13  
14  
15  
16  
17  
18  
19  
20  
21  
22  
23  
24  
25  
26  
27  
28  
29  
30  
31  
32  
33  
34  
35  
36  
37  
38  
39  
40  
41  
42  
43  
44  
45  
46  
47  
48  
49  
50  
51  
52  
53  
54  
55  
56  
57  
58  
59  
60

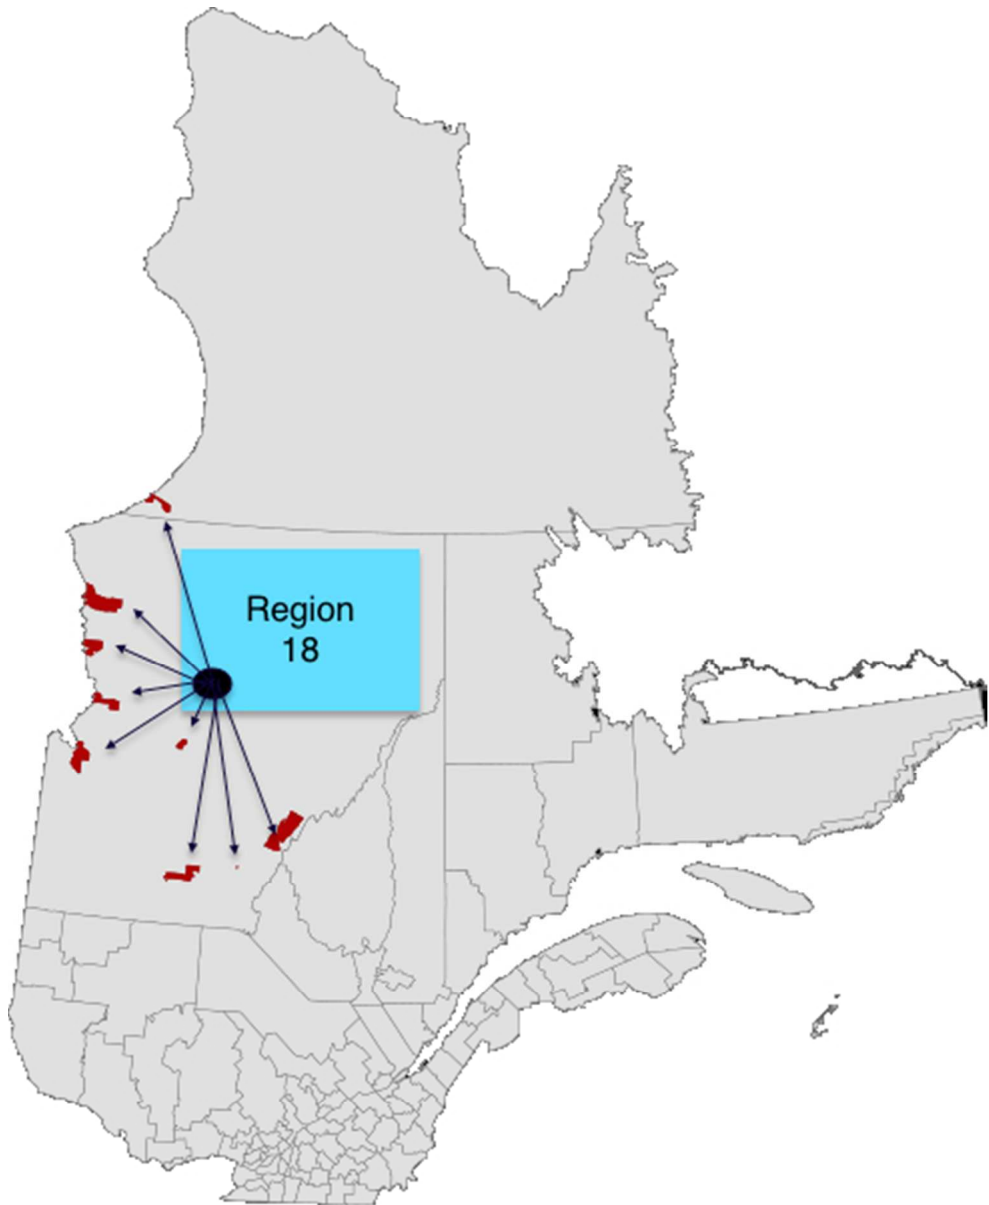

172x211mm (72 x 72 DPI)

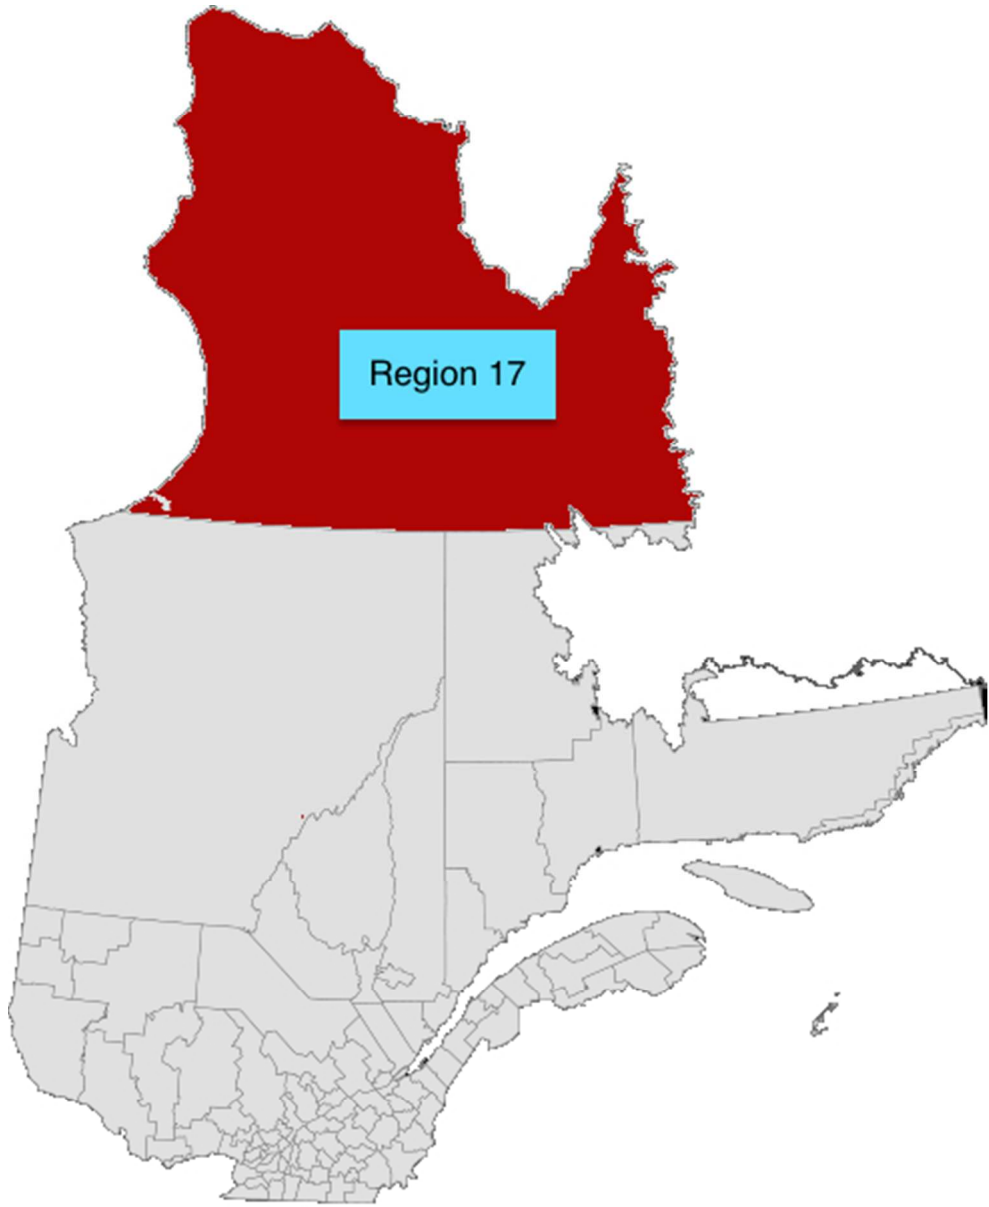

172x211mm (72 x 72 DPI)

1  
2  
3  
4  
5  
6  
7  
8  
9  
10  
11  
12  
13  
14  
15  
16  
17  
18  
19  
20  
21  
22  
23  
24  
25  
26  
27  
28  
29  
30  
31  
32  
33  
34  
35  
36  
37  
38  
39  
40  
41  
42  
43  
44  
45  
46  
47  
48  
49  
50  
51  
52  
53  
54  
55  
56  
57  
58  
59  
60

1  
2  
3  
4  
5  
6  
7  
8  
9  
10  
11  
12  
13  
14  
15  
16  
17  
18  
19  
20  
21  
22  
23  
24  
25  
26  
27  
28  
29  
30  
31  
32  
33  
34  
35  
36  
37  
38  
39  
40  
41  
42  
43  
44  
45  
46  
47  
48  
49  
50  
51  
52  
53  
54  
55  
56  
57  
58  
59  
60

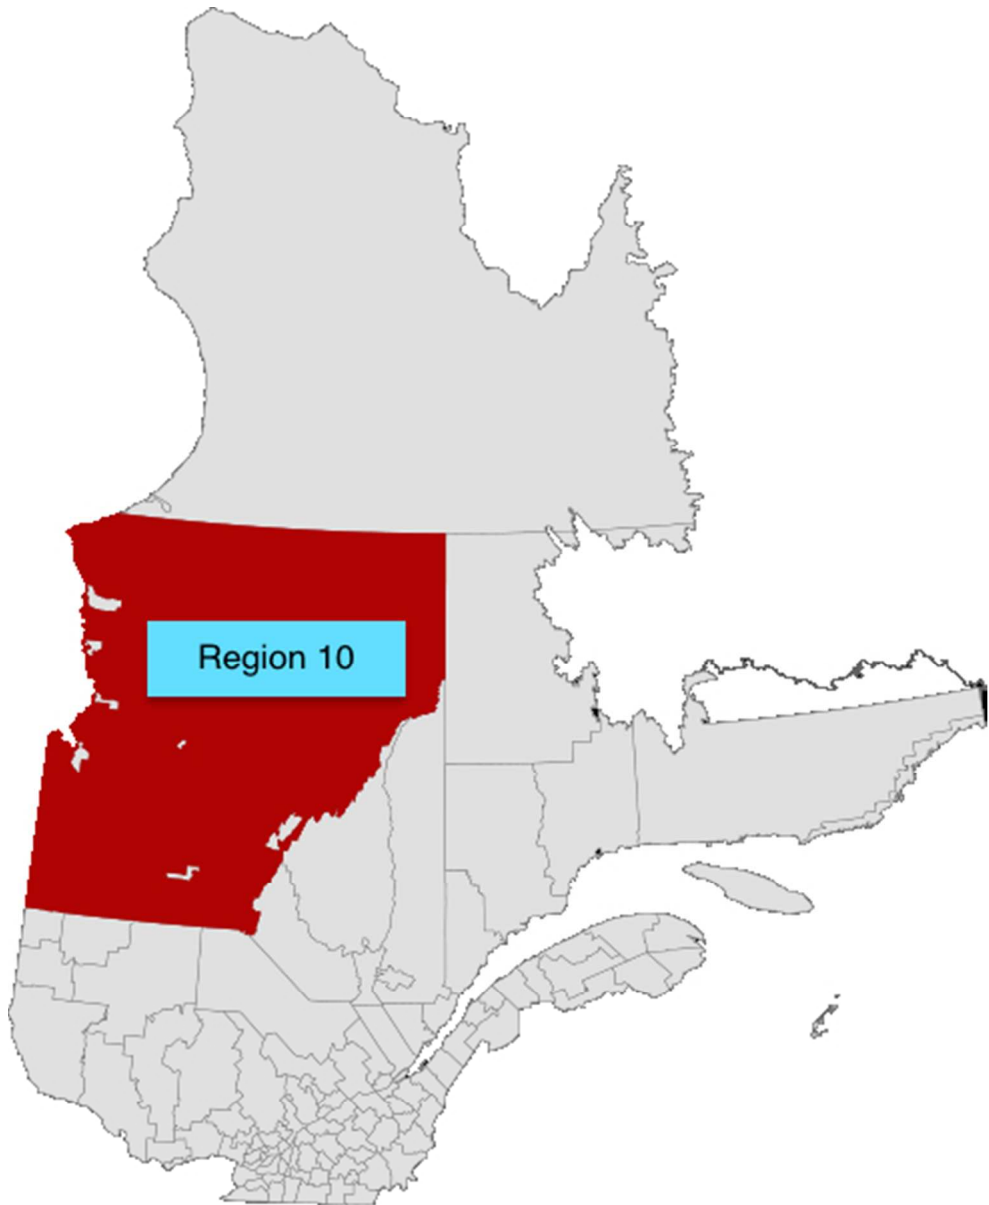

172x211mm (72 x 72 DPI)

1  
2  
3  
4  
5  
6  
7  
8  
9  
10  
11  
12  
13  
14  
15  
16  
17  
18  
19  
20  
21  
22  
23  
24  
25  
26  
27  
28  
29  
30  
31  
32  
33  
34  
35  
36  
37  
38  
39  
40  
41  
42  
43  
44  
45  
46  
47  
48  
49  
50  
51  
52  
53  
54  
55  
56  
57  
58  
59  
60

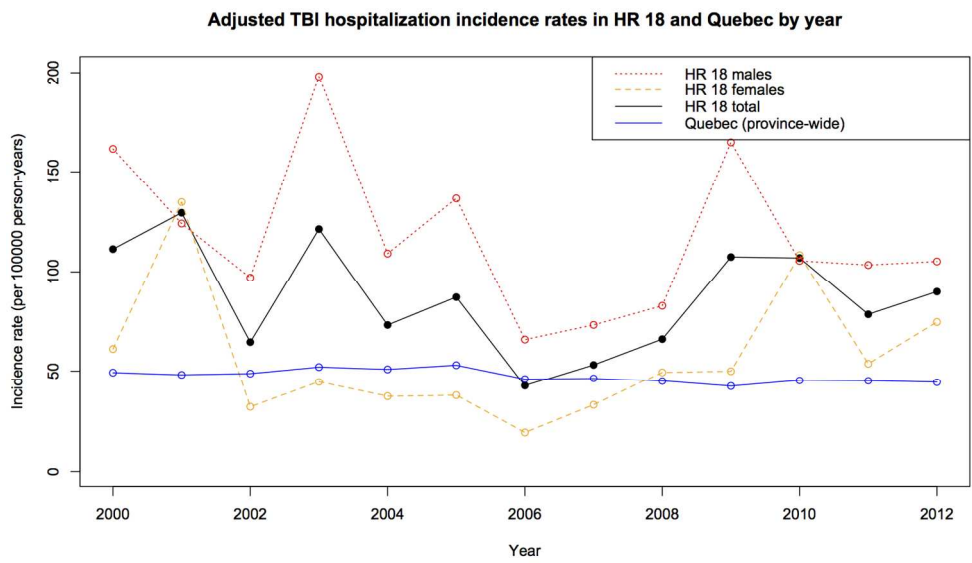

281x167mm (150 x 150 DPI)

Confidential

1  
2  
3  
4  
5  
6  
7  
8  
9  
10  
11  
12  
13  
14  
15  
16  
17  
18  
19  
20  
21  
22  
23  
24  
25  
26  
27  
28  
29  
30  
31  
32  
33  
34  
35  
36  
37  
38  
39  
40  
41  
42  
43  
44  
45  
46  
47  
48  
49  
50  
51  
52  
53  
54  
55  
56  
57  
58  
59  
60

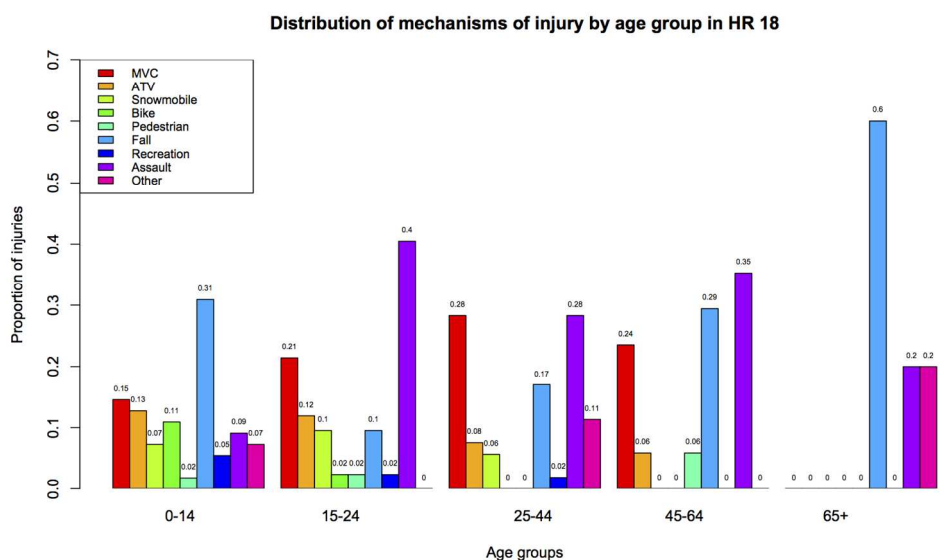

281x167mm (150 x 150 DPI)

Confidential



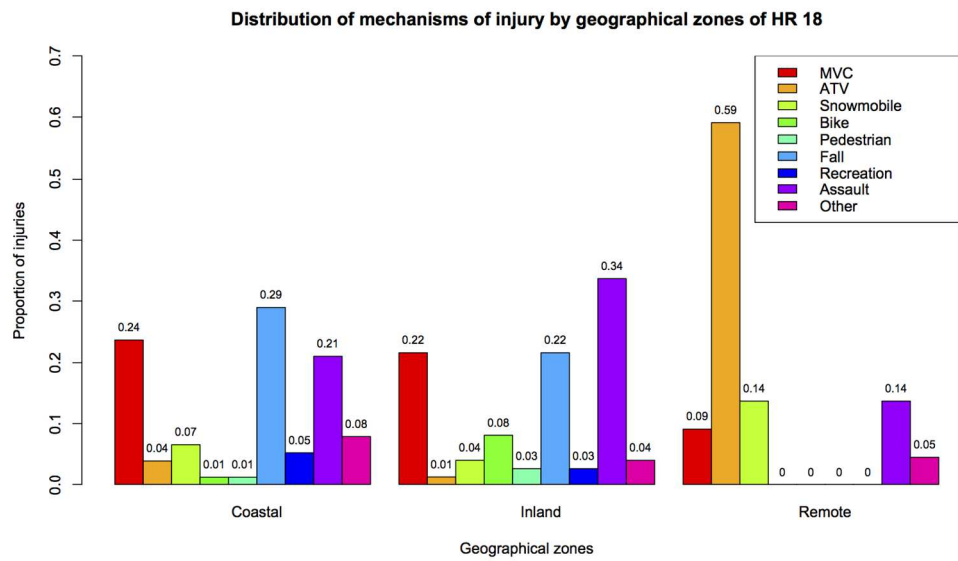

281x167mm (150 x 150 DPI)

Confidential

1  
2  
3  
4  
5  
6  
7  
8  
9  
10  
11  
12  
13  
14  
15  
16  
17  
18  
19  
20  
21  
22  
23  
24  
25  
26  
27  
28  
29  
30  
31  
32  
33  
34  
35  
36  
37  
38  
39  
40  
41  
42  
43  
44  
45  
46  
47  
48  
49  
50  
51  
52  
53  
54  
55  
56  
57  
58  
59  
60
